# 1 **The arrested state of processing bodies supports mRNA regulation** 2 **in early development**

3 M.Sankaranarayanan<sup>1\*</sup>, Ryan J. Emenecker<sup>2</sup>, Marcus Jahnel<sup>3</sup>, Irmela R. E. A.  
4 Trussina<sup>3</sup>, Matt Wayland<sup>1</sup>, Simon Alberti<sup>3</sup>, Alex S. Holehouse<sup>2</sup>, Timothy T. Weil<sup>1\*</sup>

5 <sup>1</sup> Department of Zoology, University of Cambridge, Downing Street, Cambridge CB2  
6 3EJ, UK.

7 <sup>2</sup> Department of Biomedical Engineering and Center for Science and Engineering of  
8 Living Systems, Washington University in St. Louis, 1 Brookings Drive, St. Louis, MO  
9 63130, USA.

10 <sup>3</sup> Center for Molecular and Cellular Bioengineering, Biotechnology Center, Technische  
11 Universitat Dresden, Tatzberg 47/49, 01307 Dresden, Germany.

12 \* Correspondence: [msnsankar18@gmail.com](mailto:msnsankar18@gmail.com) or [tw419@cam.ac.uk](mailto:tw419@cam.ac.uk)

## 13 **ABSTRACT**

14 Biomolecular condensates that form via liquid-liquid phase separation can exhibit  
15 diverse physical states. Despite considerable progress, the relevance of condensate  
16 physical states for *in vivo* biological function remains limited. Here, we investigated the  
17 physical properties of *in vivo* processing bodies (P bodies) and their impact on mRNA  
18 storage in mature *Drosophila* oocytes. We show that the conserved DEAD-box RNA  
19 helicase Me31B forms P body condensates which adopt a less dynamic, arrested  
20 physical state. We demonstrate that structurally distinct proteins and hydrophobic and  
21 electrostatic interactions, together with RNA and intrinsically disordered regions,  
22 regulate the physical properties of P bodies. Finally, using live imaging, we show that  
23 the arrested state of P bodies is required to prevent the premature release of *bicoid*  
24 (*bcd*) mRNA, a body axis determinant, and that P body dissolution leads to *bcd*  
25 release. Together, this work establishes a role for arrested states of biomolecular  
26 condensates in regulating cellular function in a developing organism.

## 27 INTRODUCTION

28 Many biochemical reactions in the cytoplasm of eukaryotic cells require regulation in  
29 space and time. The organization of specific reactions in the dense cytoplasmic  
30 environment is achieved through membrane-bound and membrane-less organelles.  
31 Classic membrane-bound organelles such as the nucleus and endoplasmic reticulum  
32 are stable micro-environments enclosed by membranes. However, membrane-less  
33 organelles such as stress granules, processing bodies (P bodies) and nuclear bodies  
34 have been shown to also provide an essential, dynamic level of cellular organization  
35 (Banani *et al.*, 2017; Shin and Brangwynne, 2017; Boeynaems *et al.*, 2018) . Typically  
36 composed of ribonucleic acids (RNA) and proteins, the assembly of many membrane-  
37 less organelles is well-described via a spontaneous demixing process referred to as  
38 liquid-liquid phase separation (LLPS) (Brangwynne *et al.*, 2009; Li *et al.*, 2012;  
39 Hubstenberger *et al.*, 2013; Wang *et al.*, 2014; Nott *et al.*, 2015; Zhang *et al.*, 2015;  
40 Feric *et al.*, 2016). In its simplest instantiation, LLPS occurs when a specific set of one  
41 or more macromolecules condense into a distinct liquid-like phase that is relatively  
42 enriched for those macromolecules in comparison to the surrounding and coexisting  
43 phase (e.g., cytoplasm or nucleoplasm) (Hyman, Weber and Jülicher, 2014;  
44 Brangwynne, Tompa and Pappu, 2015; Banani *et al.*, 2017; Lyon, Peebles and Rosen,  
45 2021). More generally, the designation *biomolecular condensates* has emerged as an  
46 overarching term to describe cellular assemblies characterized by the non-  
47 stoichiometric concentration of biomacromolecules, of which membrane-less  
48 organelles are one such example.

49 Ribonucleoprotein (RNP) complexes are an abundant and conserved class of  
50 biomolecular condensates. Found both in the cytoplasm and the nucleus, RNP  
51 condensates exhibit a wide range of physical states ranging from dynamic liquids to  
52 stable solids (Weber and Brangwynne, 2012; Kroschwald *et al.*, 2015, 2018; Weber,  
53 2017; Woodruff *et al.*, 2017). Some examples of diverse physical states observed *in*  
54 *vivo* include liquid-like P granules in *C. elegans* embryos (Brangwynne *et al.*, 2009;  
55 Wang *et al.*, 2014); viscous, semi-liquid nucleolus in *Xenopus laevis* oocytes  
56 (Brangwynne, Mitchison and Hyman, 2011; Feric *et al.*, 2016; Mitrea *et al.*, 2016); and  
57 solid-like Balbiani bodies in the cytoplasm of vertebrate oocytes (Boke *et al.*, 2016).  
58 Despite considerable progress in our understanding of biomolecular condensates, the

59 relationship between condensate physical state and *in vivo* function remains poorly  
60 understood. More broadly, while the study of metazoan condensates *in vitro* and in  
61 cell culture has been instrumental in our modern understanding of their role in cellular  
62 organization and function, *in vivo* approaches are much less common. RNP  
63 condensates are often linked with localized translation which enables cells to  
64 spatiotemporally regulate protein synthesis through localization, storage and  
65 translational control of stored mRNAs (Medioni, Mowry and Besse, 2012). Specialized  
66 cells, including neurons and eggs, often rely on this mode of post transcriptional  
67 regulation to control gene expression (Kloc and Etkin, 2005; Jung *et al.*, 2014).  
68 Specifically, in transcriptionally inactive oocytes, such as *Drosophila melanogaster*,  
69 prolonged storage and translational control of maternally deposited transcripts are  
70 required for body axes patterning (Tadros and Lipshitz, 2009; Lasko, 2012).

71 One mechanism for regulating RNA storage and translational control involves P  
72 bodies, an evolutionarily conserved class of cytoplasmic biomolecular condensates  
73 (Andrei *et al.*, 2005; Kedersha *et al.*, 2005; Eulalio *et al.*, 2007; Parker and Sheth,  
74 2007; Buchan, Buchan and Buchan, 2014; Hubstenberger *et al.*, 2017; Luo, Na and  
75 Slavoff, 2018). Previous work on P bodies has highlighted their roles in various  
76 aspects of RNA metabolism, including RNA storage and translational repression since  
77 P bodies are devoid of ribosomes (Weil *et al.*, 2012; Hubstenberger *et al.*, 2017). A  
78 conserved component of P bodies is the ATP-dependent DEAD box RNA helicase  
79 human DDX6, which is conserved across yeast (Dhh1), *C. elegans* (CGH-1), and  
80 *Drosophila* (Maternal expression at 31B (Me31B)). Me31B is required for early  
81 *Drosophila* development and estimated to be present at concentrations of ~7.5  $\mu$ M in  
82 the egg (Götze *et al.*, 2017). During oogenesis, Me31B is known to associate with and  
83 differentially regulate several axis-patterning maternal mRNAs (Nakamura *et al.*, 2001;  
84 Weil *et al.*, 2012). The dorsoventral determinant *gurken* mRNA is translated early in  
85 oogenesis, while *bicoid* (*bcd*) mRNA is repressed and retained in the oocyte until egg  
86 activation, a conserved process that is required before entry into embryogenesis  
87 (Tadros and Lipshitz, 2009; Weil *et al.*, 2012; Kaneuchi *et al.*, 2015; York-andersen *et al.*,  
88 2015). Failure to regulate these, and many other mRNAs can lead to severe  
89 developmental defects (Lasko, 2012). However, the mechanisms that underlie how  
90 transcripts are maintained and translationally controlled by P bodies is not well  
91 understood.

92 To examine the *in vivo* basis of mRNA regulation, we use time-lapse fluorescence  
93 microscopy, genetics and pharmacological treatments to investigate the physical  
94 properties and *in vivo* function of P bodies in the mature *Drosophila* oocyte. We find  
95 that P body condensates adopt an arrested physical state in the mature oocyte. We  
96 show that P body integrity requires weak electrostatic and hydrophobic interactions,  
97 along with RNA and the actin cytoskeleton. Using *in silico* and *in vitro* approaches, we  
98 demonstrate that intrinsically disordered regions (IDRs) regulate Me31B condensation  
99 and their physical properties. We also find that the highly disordered protein Trailer  
100 hitch (Tral) is required for the assembly and organization of P bodies. Finally, we  
101 demonstrate that the condensed and arrested state of P bodies prevents the release  
102 of *bicoid* (*bcd*) mRNA, highlighting an important cellular function of P bodies in  
103 *Drosophila* and an *in vivo* role for P body physical state. Based on these results and  
104 other analogous work, we propose that less dynamic, arrested physical states are a  
105 universal feature of RNP condensates in specialized cells to temporally regulate RNAs  
106 in response to cellular and developmental cues.

## 107 RESULTS

### 108 **Me31B forms less dynamic, arrested P body condensates in the mature oocyte**

109 Maternal mRNAs are thought to be stored and regulated by P bodies throughout  
110 oogenesis (Nakamura *et al.*, 2001; Lin *et al.*, 2008; Weil *et al.*, 2012). Egg activation  
111 of the mature oocyte, which is the final stage of oogenesis, results in the release of  
112 stored mRNAs and subsequent translation (Tadros and Lipshitz, 2009; Krauchunas  
113 and Wolfner, 2013). However, a mechanistic understanding of how the physical state  
114 of P bodies regulates mRNA remains unclear. To address this, we isolated living  
115 mature oocytes from female *Drosophila* (Figure 1A) and utilized the conserved DEAD-  
116 box RNA helicase, Me31B, to visualize P bodies (Figure 1B). Live imaging of Me31B  
117 (Me31B::GFP) revealed that P bodies are typically micron sized condensates with  
118 varying morphology and sizes (Figure 1C). We also find that most P bodies have  
119 internal subdomains indicating that they are heterogeneously organized (Figure 1D).  
120 Quantification of P body aspect ratios over time suggests that P bodies have  
121 predominantly irregular morphologies compared to liquid-like condensates which are  
122 typically spherical (Figure 1E). Additionally, P bodies undergo continuous  
123 morphological rearrangement, with most progressing from irregular to more rounded  
124 shapes (Figure 2A). Aspect ratio analysis of individual condensates followed over time  
125 showed rearrangement of P bodies relaxing from an amorphous to a round shape in  
126 30 minutes (Figure 2A), more slowly than many previously studied liquid-like  
127 condensates (Brangwynne *et al.*, 2009; Feric *et al.*, 2016). Although P bodies undergo  
128 fusion and fission events (Figure 2B, 2B', and S1), which are a hallmark of liquid-like  
129 condensates, the longer timescale of these events indicate that P bodies in the mature  
130 *Drosophila* oocyte are less dynamic compared to known liquid-like condensates such  
131 as P granules and stress granules (Brangwynne *et al.*, 2009; Patel *et al.*, 2015).

132 The cytoplasm of the mature oocyte is packed with yolk granules, organelles, and  
133 complex cytoskeletal structures. To determine if the slow P body dynamics are an  
134 intrinsic property or dependent on the oocyte cytoplasmic environment, we developed  
135 an *ex vivo* assay whereby we extrude the cytoplasm into halocarbon oil (Figure 2C).  
136 Importantly, this approach does not promote P body dissolution, rather, extruded P  
137 bodies initially exhibit irregular morphologies but become spherical with time (Figure  
138 2C'). Consistent with *in vivo* observations, we also show extruded P bodies undergo  
139 fusion and fission events over longer timescales (Figure 2D and 2D'). Taken together

140 our data suggests that P bodies are slowly rearranging viscoelastic condensates, and  
141 that this physical state is inherent to P bodies from mature *Drosophila* oocytes.

142 We next performed Fluorescence Recovery After Photobleaching (FRAP) on whole P  
143 bodies (whole FRAP) to examine the mobility of Me31B between the cytoplasm and P  
144 body. This analysis revealed that Me31B localized to P bodies exhibited limited or no  
145 recovery (Figure 2E and 2F). Due to their inability to exchange Me31B with the  
146 cytoplasm, we refer to this as the arrested state of P bodies. To further explore Me31B  
147 dynamics, we tested if Me31B can rearrange within P bodies by observing the  
148 recovery of Me31B fluorescence after photobleaching within a region inside the P body  
149 (internal FRAP) (Figure 2E and 2F). Measurements revealed considerable recovery  
150 that progresses from the periphery to the center of the P body (Figure S2A). Despite  
151 exhibiting a higher mobile fraction than whole FRAP, the rate of recovery (Figure S2B)  
152 indicates that Me31B exchanges slower internally compared to liquid-like  
153 condensates. Overall, these data show that P bodies in the mature oocyte adopt a  
154 less dynamic and arrested physical state.

### 155 **Weak intermolecular, cytoskeletal and RNA interactions regulate P physical** 156 **properties**

157 Previous work has shown that activation of the mature oocyte results in an influx of  
158 monovalent and divalent ions, release of stored mRNAs, and reorganization of the  
159 actin cytoskeleton (Kaneuchi *et al.*, 2015; York-andersen *et al.*, 2015; Andersen *et al.*,  
160 2020). We therefore wondered if these factors could regulate the physical properties  
161 of P bodies in the mature oocyte, prior to egg activation.

162 Various molecular interactions have been shown to contribute to RNP condensation  
163 including electrostatic, cation- $\pi$  and hydrophobic interactions (Kato *et al.*, 2012;  
164 Brangwynne, Tompa and Pappu, 2015; Nott *et al.*, 2015; Pak *et al.*, 2016; Riback *et al.*,  
165 2017; Murthy *et al.*, 2019; Dzuricky *et al.*, 2020). The interactions that are thought  
166 to drive the assembly of P bodies can be interpreted through the lens of a pseudo-two  
167 component phase diagram (Figure 3A). In particular, by changing the solution  
168 conditions to weaken the interactions that contribute to P body assembly, theory and  
169 simulations predict an increase in internal mobility and more spherical condensates,  
170 as shown previously for protein-RNA condensates (Boeynaems *et al.*, 2019).

171 To test if hydrophobic interactions are required for *in vivo* P body integrity, we treated  
172 mature oocytes with the aliphatic alcohol 1,6-hexanediol (1,6-HD), a compound  
173 identified originally in the context of attenuating hydrophobic interactions (Ribbeck and  
174 Go, 2002; Patel *et al.*, 2007). Addition of 1,6-HD resulted in the transformation of P  
175 bodies from irregular to spherical morphologies and an increase in condensate fusion  
176 events (Figure 3B, 3C, and S3A). These results support a model in which 1,6-HD  
177 weakens the intermolecular interactions that contribute to P body integrity. To further  
178 test if the disruption of hydrophobic interactions leads to a transition from an arrested  
179 to a more dynamic state, we performed whole FRAP on 1,6-HD treated P bodies.  
180 Consistent with our model, 1,6-HD treated P bodies exhibit rapid and sustained  
181 recovery (Figure 3D, S3B, and S3C). Taken together, our results suggest that  
182 hydrophobic interactions contribute to regulating the arrested state of P bodies.

183 We next examined if electrostatic interactions contribute to P body physical properties  
184 by testing the impact of monovalent (NaCl) or divalent salt (MgCl<sub>2</sub>). At low  
185 concentrations of NaCl, P bodies assemble into clusters while at high concentrations  
186 they dissociate (Figure 3E). However, at a specific range of concentrations (300 – 600  
187 mM), P bodies adopt spherical morphologies, consistent with a more dynamic state.  
188 These results are supportive of a model in which electrostatic interactions, like  
189 hydrophobic interactions, play a role in dictating physical properties and can be tuned  
190 up or down by decreasing or increasing the monovalent salt concentrations,  
191 respectively.

192 Interestingly, the addition of 20 mM MgCl<sub>2</sub> had no apparent effect on P body integrity,  
193 yet a small increase to concentrations as low as 50 mM MgCl<sub>2</sub> results in their complete  
194 dissociation (Figure 3E'). This relative sensitivity to divalent cations implies an effect  
195 beyond simply ionic strength. Collectively these data suggest that changes in salt  
196 concentration can alter P body integrity, likely via both ion-specific effects and  
197 electrostatic screening. This is consistent with the morphology and state of P bodies  
198 that we observe following *ex vivo* egg activation or in the early embryo (York-andersen  
199 *et al.*, 2015).

200 Given the importance of electrostatic interactions, we asked if P body integrity was  
201 regulated exclusively by protein-protein interactions, or if protein-RNA interactions  
202 also contribute. To test this, we treated mature oocytes with RNase A, which leads to

203 P body dissociation over a time course of 30 minutes (Figure 3F). This result reveals  
204 that that *in vivo* P body integrity depends, at least in part, on protein:RNA interactions  
205 but this does exclude a contribution from protein-protein interactions.

206 Finally, to examine the role of actin in regulating P body integrity, mature oocytes were  
207 treated with cytochalasin D, a commonly used actin depolymerizing agent. This  
208 treatment resulted in the dissociation of P bodies in 30 minutes, consistent with our  
209 data from *ex vivo* egg activation (Figure 3F'). Taken together, these results indicate  
210 that multiple factors regulate P body integrity and morphology in the mature oocyte.

### 211 **IDRs regulate the physical state of Me31B condensates *in vitro***

212 Having established a role for multiple external factors in the regulation of P body  
213 integrity, we next asked how the Me31B protein may be contributing to P body physical  
214 state. Me31B contains an ATP-binding domain and folded helicase domain, flanked  
215 by short N- and C-terminal IDRs (Figure 4A). While the function of the helicase domain  
216 is well known, the function of the disordered regions is rather unclear. Since Me31B is  
217 an essential *in vivo* protein, we adopted an *in vitro* approach to examine the role of  
218 these disordered regions.

219 First, we tested if the purified recombinant Me31B (GFP-Me31B) can undergo phase  
220 separation *in vitro*. While Me31B is diffuse at physiological protein concentrations (7.5  
221  $\mu\text{M}$ ), upon the addition of a small amount of crowding agent (1% PEG) Me31B  
222 undergoes phase separation to form condensates (Figure 4B). We reproduced Me31B  
223 condensation using a secondary crowding agent (1% Ficoll), demonstrating that  
224 Me31B phase separation does not result from the specific chemical properties of the  
225 used crowding agent (Figure S4A). Time lapse imaging revealed that Me31B initially  
226 forms condensates with highly dynamic properties, as evidenced by an increase in  
227 condensate size (Figure S4B). However, over time these condensates become less  
228 dynamic, as the apparent fusion kinetics of Me31B condensates slows as a function  
229 of time (Figure S4C). To test whether or not the Me31B molecules in the initial  
230 condensates are mobile, we performed both whole FRAP and internal FRAP on freshly  
231 formed condensates. To our surprise, these showed little or no recovery after  
232 photobleaching, indicating that Me31B condensates are present in an arrested  
233 physical state similar to *in vivo* P bodies (Figure 4C).



234 It has been suggested that the assembly and properties of RNP condensates is  
235 regulated by IDRs (Lin, David S.W. Protter, *et al.*, 2015; Martin and Mittag, 2018;  
236 Martin *et al.*, 2020). Previous work has shown that the sequence length and position  
237 of IDRs varied greatly between DDX6 and Dhh1 (Hondele *et al.*, 2019). To examine  
238 the extent of variation across the DDX6 family of proteins, we performed a sequence  
239 analysis of Me31B orthologs. This revealed that folded domains are highly conserved  
240 while IDR length and sequence varied substantially (Figure 4D).

241 To better understand how the IDRs might contribute to function, we performed all-  
242 atom simulations of full-length Me31B. Simulations revealed that both IDRs adopt a  
243 heterogeneous ensemble of states (Figure 4E). Interestingly, both N- and C- terminal  
244 IDRs interacted transiently and relatively non-specifically with the surface of the folded  
245 domains. These contacts were mediated through electrostatic and hydrophobic  
246 interactions (Figure 4F, S4D, and S4E). Rather than acting as drivers of self-assembly,  
247 our simulations suggest the possibility that IDRs play a modulatory role.

248 To test for the modulatory influence of IDRs in Me31B phase separation, we next  
249 purified recombinant Me31B with both IDRs deleted (Me31B $\Delta$ N- $\Delta$ C). Consistent with  
250 the interpretation from our simulations, Me31B $\Delta$ N- $\Delta$ C rapidly self-assembled into  
251 solid-like aggregates (Figure 4F and S4F). These results demonstrate that protein-  
252 protein interactions can be established independently of the IDRs and suggests that  
253 the folded domain plays an important role in driving self-assembly. Importantly, our  
254 results demonstrate that the IDRs tune the physical properties of Me31B condensates,  
255 attenuating the strong interactions established among the interacting folded domains.

256 Taken together, our results show that recombinant Me31B is prone to form  
257 condensates with a less dynamic and arrested physical state, consistent with *in vivo*  
258 data. Importantly, the short IDRs from Me31B function to modulate the condensate  
259 physical state, suggesting that the interactions that drive Me31B self-assembly  
260 originate from the folded domains.

### 261 **Tral is key to regulating organization of P bodies in the mature oocyte**

262 In addition to Me31B, several other proteins localize to, or are found to be enriched  
263 within P bodies (Lin *et al.*, 2008). Given the importance of disordered regions within  
264 Me31B, we hypothesized that intrinsically disordered proteins (IDPs) within P bodies

265 could potentially act as lubricants to regulate P body assembly and organization  
266 through interactions with structured proteins. To test this, we first performed disorder  
267 prediction across the set of known P body proteins to estimate the proportion of  
268 structured versus disordered regions (Figure 5A). Approximately 50% of proteins  
269 known to localize to P bodies in *Drosophila* contain long IDRs, highlighting the  
270 structural heterogeneity of components within P bodies. Among the proteins enriched  
271 with intrinsic disorder is Tral, a member of the LSM protein family (RAP55 in  
272 vertebrates, CAR-1 in *C. elegans*). Additionally, Tral is also known to interact directly  
273 with Me31B, function in *Drosophila* axis patterning (Bouveret, 2000; Monzo *et al.*,  
274 2006; Tritschler *et al.*, 2007, 2008, 2009; Götze *et al.*, 2017; Wang *et al.*, 2017; Hara  
275 *et al.*, 2018; McCambridge *et al.*, 2020) and is predicted to be largely disordered with  
276 the exception of an N-terminal LSM domain (Figure 5B).

277 We therefore tested the role of Tral in the regulation of P body assembly *in vivo*. In  
278 mature oocytes expressing GFP::Tral, like Me31B, Tral associates with P body  
279 condensates (Figure 5C). Despite being localized to the same condensate, different  
280 proteins do not need to follow equivalent dynamics (Boeynaems *et al.*, 2019). We  
281 therefore asked whether Tral shows similar *in vivo* behaviors to Me31B, which would  
282 suggest that these two proteins are associated with the same physical state. Indeed,  
283 despite being structurally distinct from Me31B, whole FRAP and 1,6-HD experiments  
284 on Tral were consistent with our results for Me31B (Figure 5D). This supports a model  
285 in which Me31B and Tral are strongly coupled within P bodies, likely through direct  
286 interaction or interaction with a common intermediate (e.g., RNA).

287 Work in arrested *C. elegans* oocytes has shown that the organization and properties  
288 of germline P bodies is regulated by orthologs of Tral (CAR-1) and Me31B (CHG-1),  
289 where loss of CGH-1 resulted in the formation of morphologically deformed P bodies  
290 with altered physical properties (Hubstenberger *et al.*, 2013). Since Me31B is essential  
291 for *Drosophila* oogenesis, we tested if Tral is required to regulate Me31B labeled P  
292 bodies in the mature oocyte. Remarkably, in Tral mutants, P bodies have dramatically  
293 different morphologies and form rod and planar donut-shaped assemblies (Figure 5E),  
294 implying a gain of anisotropy in the underlying molecular arrangement of the  
295 condensate. The formation of apparently ordered (or partially ordered) assemblies is  
296 reminiscent of liquid-crystalline formation as observed in the synaptonemal complex

297 or in specific mutants of the plant protein FLOE1 (Rog, Köhler and Dernburg, 2017;  
298 Dorone *et al.*, 2020). These results suggest that despite being structurally distinct, Tral  
299 and Me31B contribute to the assembly and organization of P bodies likely through  
300 synergistic interactions.

### 301 **The condensed and arrested state of P bodies regulate *bcd* mRNA**

302 Our data shows that P bodies in the mature *Drosophila* oocyte are present in a less  
303 dynamic, arrested physical state. This is in contrast to previous data in cells where  
304 related RNP condensates are shown to exhibit dynamic behavior adopting liquid-like  
305 states (Kroschwald *et al.*, 2015). Since P bodies in the mature oocyte contain maternal  
306 mRNAs that are stored and translationally regulated over long periods, we  
307 hypothesized that the less dynamic and arrested physical state could be required for  
308 this function.

309 The anterior determinant *bcd* mRNA is a well-established example of long-term  
310 storage and localizes to P bodies in the mature oocyte (Figure 6A). To address if the  
311 condensed state of P bodies is required for the association with *bcd* mRNA, we first  
312 tested the change in P body and *bcd* mRNA distribution following egg activation. Using  
313 a previously established *ex vivo* egg activation assay, we show that both P bodies and  
314 *bcd* mRNA undergo rapid dispersion (Figure 6B). This result indicates that the  
315 transition of P bodies from a condensed to diffused state leads to the release of *bcd*  
316 mRNA. This finding is consistent with data arguing that translation of *bcd* mRNA only  
317 occurs after egg activation and when the mRNA is no longer inside of P bodies (Weil  
318 *et al.*, 2012; Eichhorn *et al.*, 2016).

319 To further explore this phenomenon, we developed a simple coarse-grained model in  
320 which protein and RNA will co-assemble to form condensates *in silico* (Figure 6C and  
321 S5). In our model, protein and RNA molecules possess attractive protein:protein and  
322 protein:RNA interactions that form multi-component condensates through phase  
323 separation. Condensate stability depends on both the strength of protein-protein and  
324 protein-RNA interactions, such that over the concentration range examined both  
325 species are necessary for phase separation. In simulations where the protein-protein  
326 interaction strength is systematically weakened we observe a concomitant release of  
327 RNA into the dilute phase and loss of condensate integrity. These simulations predict

328 that condensate integrity can be viewed as a proxy for RNA sequestration and storage.  
329 We therefore sought to test this prediction *in vivo*.

330 Since we can experimentally alter the physical state of P bodies with small molecules,  
331 we asked if an arrested state is necessary for the association of *bcd* mRNA with P  
332 bodies. Upon 1,6-HD treatment of mature oocytes, both P bodies and *bcd* mRNA  
333 initially adopt spherical morphologies, consistent with a loss of P body integrity and  
334 transition to a more dynamic state (Figure 6D). However, in line with our predictions,  
335 while P bodies remain condensed and spherical, *bcd* mRNA becomes diffuse and is  
336 no longer observed in P bodies (Figure 6E and 6F). Together, these data suggest that  
337 changing the state of P bodies, either experimentally or with a developmental cue,  
338 causes release and potentially translation of stored mRNAs.

## 339 DISCUSSION

340 Over the last decade, biomolecular condensates have emerged as a key principle in  
341 cellular organization. While changes in condensate physical properties have been  
342 examined extensively *in vitro*, the *in vivo* importance and function of physical states  
343 has been much less explored. In this study, we focused on the physical properties that  
344 are likely to enable P bodies to regulate mRNA in mature *Drosophila* oocytes. We  
345 demonstrate that a combination of intrinsic (intermolecular interactions, presence of  
346 IDRs) and extrinsic (RNA, actin, disordered proteins) factors can regulate the integrity  
347 and the arrested physical state of P bodies, both of which allow regulation of *bcd*  
348 mRNA *in vivo*. Overall, we propose that condensates with less dynamic, arrested  
349 physical states offer a controlled mechanism for long-term storage of translationally  
350 repressed mRNAs.

351 While dynamic, liquid-like states have been observed for many biomolecular  
352 condensates, there is a growing repertoire of functionally important and dynamically  
353 arrested condensates (Brangwynne, Mitchison and Hyman, 2011; Hubstenberger *et*  
354 *al.*, 2013; Boke *et al.*, 2016; Woodruff *et al.*, 2017). Balbiani bodies, for instance, adopt  
355 a solid-like physical state which is thought to facilitate prolonged storage of organelles  
356 and macromolecules in dormant vertebrate oocytes (Boke *et al.*, 2016). Similarly, the  
357 nucleolus in *Xenopus laevis* oocytes is shown to exist in a highly viscous physical state  
358 under physiological conditions (Brangwynne, Mitchison and Hyman, 2011). P bodies  
359 in *Drosophila* eggs also exhibit a similar physical state which likely enables long term  
360 storage of maternal mRNAs by strongly inhibiting access to ribosomes in the  
361 cytoplasm. Analogous properties have been observed in the germline P bodies of  
362 arrested *C. elegans* oocytes (Hubstenberger *et al.*, 2013), suggesting that less  
363 dynamic and arrested properties of RNP condensates could be an evolutionarily  
364 conserved mechanism to temporally regulate mRNAs essential for normal  
365 development. Importantly, dynamically arrested physical states of RNP condensates  
366 are likely not limited to egg cells but may be preserved across other specialized cell  
367 types such as neurons. For example, mRNAs stored and translationally repressed in  
368 neuronal RNP condensates are temporally translated in an activity induced manner at  
369 specific synapses, thereby influencing short-term or long-term memory  
370 (Rajasethupathy *et al.*, 2009; Puthanveetil, 2013). While it is not clear how this  
371 translation is regulated, models suggest that RNP granules switch between dynamic

372 liquid-like and solid-like states to facilitate differential translation control (Majumdar *et*  
373 *al.*, 2012; Sudhakaran and Ramaswami, 2017; Bakthavachalu *et al.*, 2018). Beyond  
374 RNPs, in *A. thaliana*, dynamically arrested cytoplasmic condensates rewire  
375 transcription by sequestering a subset of the auxin-responsive transcription factor,  
376 preventing its nuclear function (Powers *et al.*, 2019).

377 One striking observation is the influence of disordered regions and/or proteins in  
378 regulating the physical state of P body condensates. Conventional wisdom posits that  
379 IDRs contribute weak multivalent interactions that are essential for phase separation.  
380 In support of this model, many proteins that undergo phase separation contain IDRs  
381 that are necessary and sufficient for assembly (Lin, David S.W. Protter, *et al.*, 2015;  
382 Protter *et al.*, 2018). Our results offer an alternative model; rather than driving  
383 assembly, IDRs may also function to modulate and tune interactions between folded  
384 domains, potentially providing a local lubricant that counteracts strong multivalent  
385 interactions driven by adhesive interaction sites on folded domains. In the absence of  
386 IDRs, the folded domains from Me31B undergo irreversible aggregation. As such, the  
387 IDRs provide evolutionarily malleable modules to tune the physical state of  
388 condensates. This model echoes prior work on the yeast prion protein Sup35, where  
389 the loss of N-terminal disordered regions lead to robust aggregation of the folded C-  
390 terminal domain, while the full-length protein rapidly assembles into dynamic  
391 condensates that rapidly mature into gel-like assemblies (Franzmann *et al.*, 2018). As  
392 such, we speculate that the disordered regions across Me31B orthologs (and indeed  
393 more generally DDX helicases) may have emerged to modulate the physical state of  
394 the resulting RNP complexes that form, be they micron-scale membrane-less  
395 organelles such as P bodies, or mesoscopic clusters of protein and RNA.

396 One other key determinant that regulates biomolecular condensates is multivalency.  
397 Condensates such as P bodies contain hundreds of diverse RNP components which  
398 serve as a major source of multivalent interactions that control their integrity and  
399 physical properties. While structured and disordered RNA-binding proteins have been  
400 investigated previously whether or how they influence the overall property of  
401 condensates *in vivo*, was unclear. Using Me31B and Tral, our data indicates that  
402 structurally distinct proteins synergistically interact to regulate the assembly and  
403 organization of P bodies during *Drosophila* oogenesis. Despite being structurally

404 different to Me31B, Tral exhibits strikingly similar physical properties as Me31B when  
405 examined in P body condensates. However, loss of Tral results in structurally  
406 deformed and physically altered P bodies. These data also agree with observations  
407 reported for Tral and Me31B orthologues in arrested *C. elegans* oocytes  
408 (Hubstenberger *et al.*, 2013) suggesting that despite sequence and structural  
409 divergence, the underlying molecular and physical interactions between components  
410 of RNP condensates may be evolutionarily conserved.

411 Prior to this work, it was unclear how stored mRNAs could be subjected to differential  
412 release and translation at distinct developmental stages without obviously disrupting  
413 the integrity of P bodies. As demonstrated for several RNA binding proteins, the  
414 assembly and physical properties of RNP condensates are largely regulated by weak  
415 intermolecular forces. We show that the physical properties of P bodies in the mature  
416 oocyte are disrupted by both 1,6-HD and salt, implicating a role for hydrophobic and  
417 electrostatic interactions in P body integrity. We speculate that modulating the  
418 strengths of different interactions allows P bodies to adjust their physical state, thereby  
419 facilitating fine-tuned control of mRNA storage and subsequent translation in response  
420 to developmental cues.

421 In summary, we describe the less dynamic, arrested physical state of Me31B labeled  
422 P body condensates and their potential role in regulating the storage of *bcd* mRNA in  
423 the mature *Drosophila* oocyte. The ability of weak intermolecular interactions, modular  
424 protein regions and cellular factors to regulate condensate physical state provides an  
425 elegant mechanism for P bodies to respond to cellular and developmental cues (Figure  
426 7). We predict that such physical states are likely a universal feature of RNP  
427 condensates in specialized cells that require long term translational regulation of  
428 stored mRNAs.

429 **FIGURE 1**

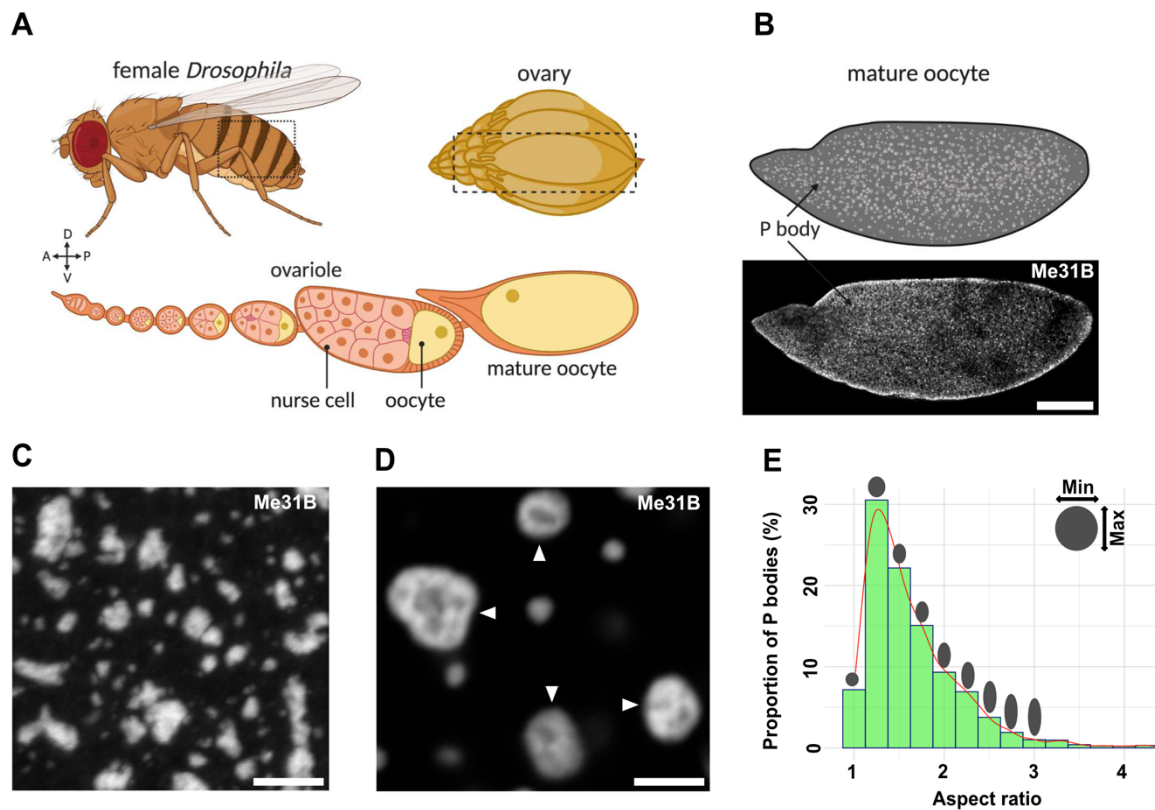

430 **Figure 1: Me31B forms heterogeneous P body condensates in the mature oocyte**  
431 **(A)** Schematic of a *Drosophila* female, ovary and ovariole. Each female contains two  
432 ovaries that are each comprised of 16-18 ovarioles. Each ovariole can be thought of  
433 as an assembly line for the production of mature oocytes. The oocyte is supported by  
434 a collection of nurse cells until the late stages of oogenesis. Created with  
435 BioRender.com  
436 **(B-E)** Mature oocyte expressing Me31B::GFP.  
437 **(B)** Cartoon depicting P body distribution in the mature oocyte and confocal image of  
438 a whole mature oocyte showing P bodies throughout the cytoplasm. The concentration  
439 of P bodies at the cortex is in part due to this being a cross section image.  
440 **(C)** Increased magnification reveals P bodies exhibit diverse morphologies and sizes.  
441 Maximum projection 10  $\mu\text{m}$ .  
442 **(D)** Representative image of P bodies exhibiting multiple subdomains (white  
443 arrowheads) indicative of heterogeneous internal organization.  
444 **(E)** Aspect ratio analysis of individual P bodies ( $>1 \mu\text{m}$ ) showing an uneven range of  
445 P body morphology.  
446 Scale bar = 100  $\mu\text{m}$  (B), 5  $\mu\text{m}$  (C,D).



447 **FIGURE 2**

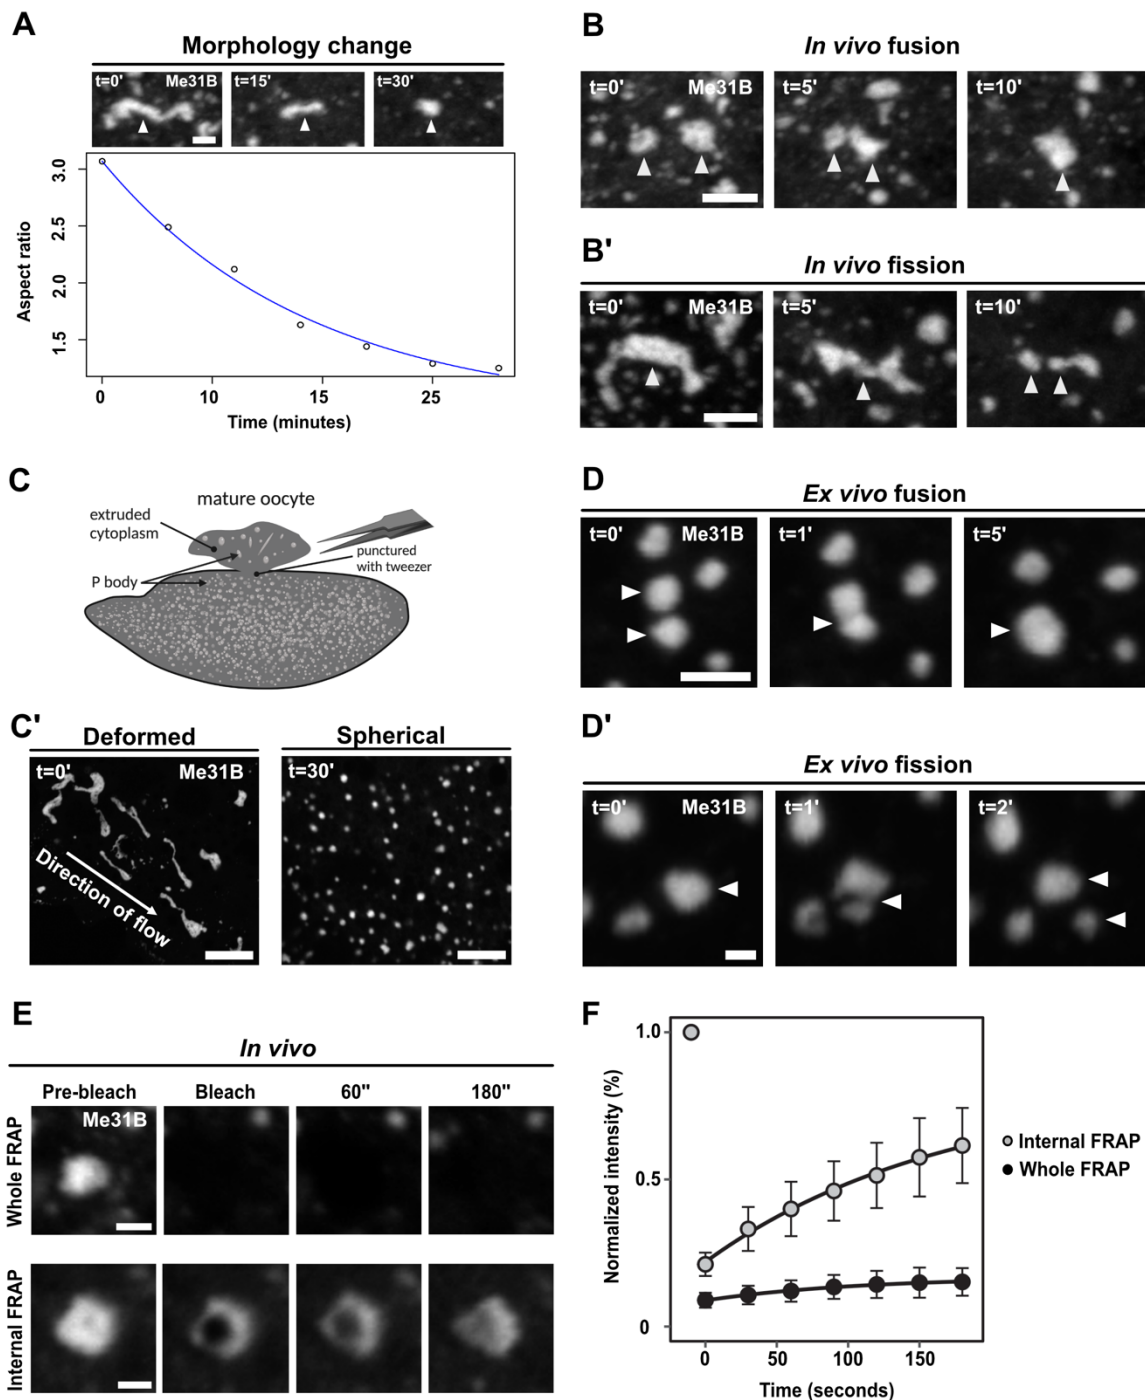

448 **Figure 2: P bodies adopt a less dynamic and arrested physical state**

449 (A, B, B', C', D, D', E) Mature oocyte expressing Me31B::GFP.

450 (A) Time series of a P body displaying elastic behaviour, starting in an extended state  
 451 (t=0') and subsequently relaxing towards a spherical morphology (t=30'). Plot of  
 452 individual P body (n = 10) A.R over time showing relaxation from extended (A.R~3) to  
 453 spherical morphology (A.R~1).

454 **(B)** Time series of two *in vivo* P bodies undergoing coalescence (white arrowheads).  
455 **(B')** Time series of a single *in vivo* P body undergoing fission to form two distinct  
456 condensates (white arrowheads).  
457 **(C)** Cartoon depicting cytoplasmic extrusion of P bodies into halocarbon oil (*ex vivo*)  
458 induced by puncturing the outer membrane of the mature oocyte. Created with  
459 BioRender.com **(C')** Confocal image of *ex vivo* P bodies displaying stretched elastic  
460 morphologies shortly after extrusion ( $t=0'$ ). Over time, extruded P bodies relax into  
461 homogeneous spherical condensates ( $t=30'$ ).  
462 **(D)** Time series of *ex vivo* P bodies undergoing coalescence (white arrowheads). **(D')**  
463 Time series of *ex vivo* extruded P bodies undergoing fission (white arrowheads).  
464 **(E)** Time series of whole FRAP of P body shows minimal recovery, while internal FRAP  
465 of P body shows increased recovery of Me31B fluorescence.  
466 **(F)** P body recovery profiles after whole FRAP and internal FRAP ( $n = 20$  P bodies for  
467 whole FRAP and  $n = 24$  P bodies for internal FRAP).  
468 Scale bar = 2.5  $\mu\text{m}$  (A), 5  $\mu\text{m}$  (B,B',D,D'), 10  $\mu\text{m}$  (C'), 1.5  $\mu\text{m}$  (E).

469 **FIGURE 3**

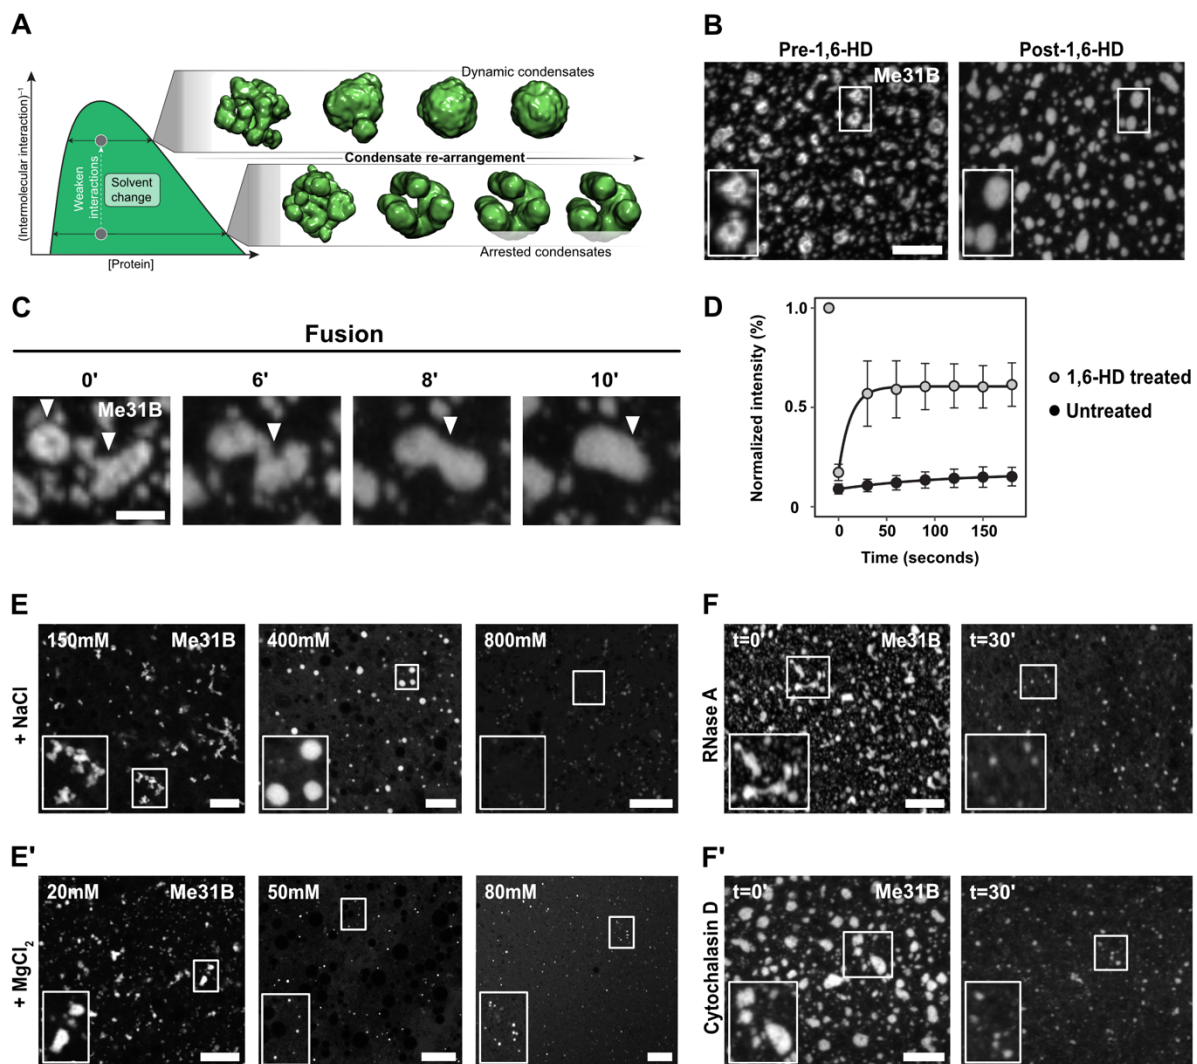

470 **Figure 3: P body physical properties are regulated by hydrophobic and**  
 471 **electrostatic interactions along with RNA and actin**

472 **(A)** Schematized phase diagram in which protein concentration extends along the x-  
 473 axis whereas molecular interaction strength extends across the y-axis. Inset shows  
 474 snapshots from coarse-grained simulations performed at distinct position along the y-  
 475 axis. Condensate morphology is dependent on intramolecular interaction strength,  
 476 such that weak intermolecular interactions lead to spherical condensates, while strong  
 477 intermolecular interactions lead to kinetically arrested amorphous condensates.

478 **(B,C,E-F')** Mature oocyte expressing Me31B::GFP.

479 **(B)** Addition of 5% 1,6-HD causes P bodies to transform from amorphous to spherical  
 480 morphology. Furthermore, addition of 1,6-HD results in the loss of internal  
 481 heterogeneity of P bodies. Maximum projection 5  $\mu$ m.

482 **(C)** Time series shows two P bodies undergoing coalescence following the addition of  
483 1,6-HD. Maximum projection 5  $\mu\text{m}$ .  
484 **(D)** Whole FRAP recovery profile of 1,6-HD treated P bodies ( $n = 12$ ) showing rapid  
485 fluorescence recovery compared to untreated P bodies ( $n = 24$ ).  
486 **(E)** Addition of varying concentrations of NaCl results in diverse physical states of  
487 extruded P bodies ranging from sticky (150 mM) to liquid-like (400 mM) and diffuse  
488 state (800 mM). **(E')** Treatment with  $\text{MgCl}_2$  results in the dissociation of extruded P  
489 bodies at concentrations significantly lower than NaCl.  
490 **(F)** Treatment with 500 ng/ $\mu\text{l}$  RNase A (degrades RNA) or **(F')** 10  $\mu\text{g}/\mu\text{l}$  cytochalasin-  
491 D (depolymerizes actin) causes P body dissociation, resulting in smaller condensates.  
492 Maximum projection 10  $\mu\text{m}$ .  
493 Scale bar = 5  $\mu\text{m}$  (B,C,E,E',F,F')

494 **FIGURE 4**

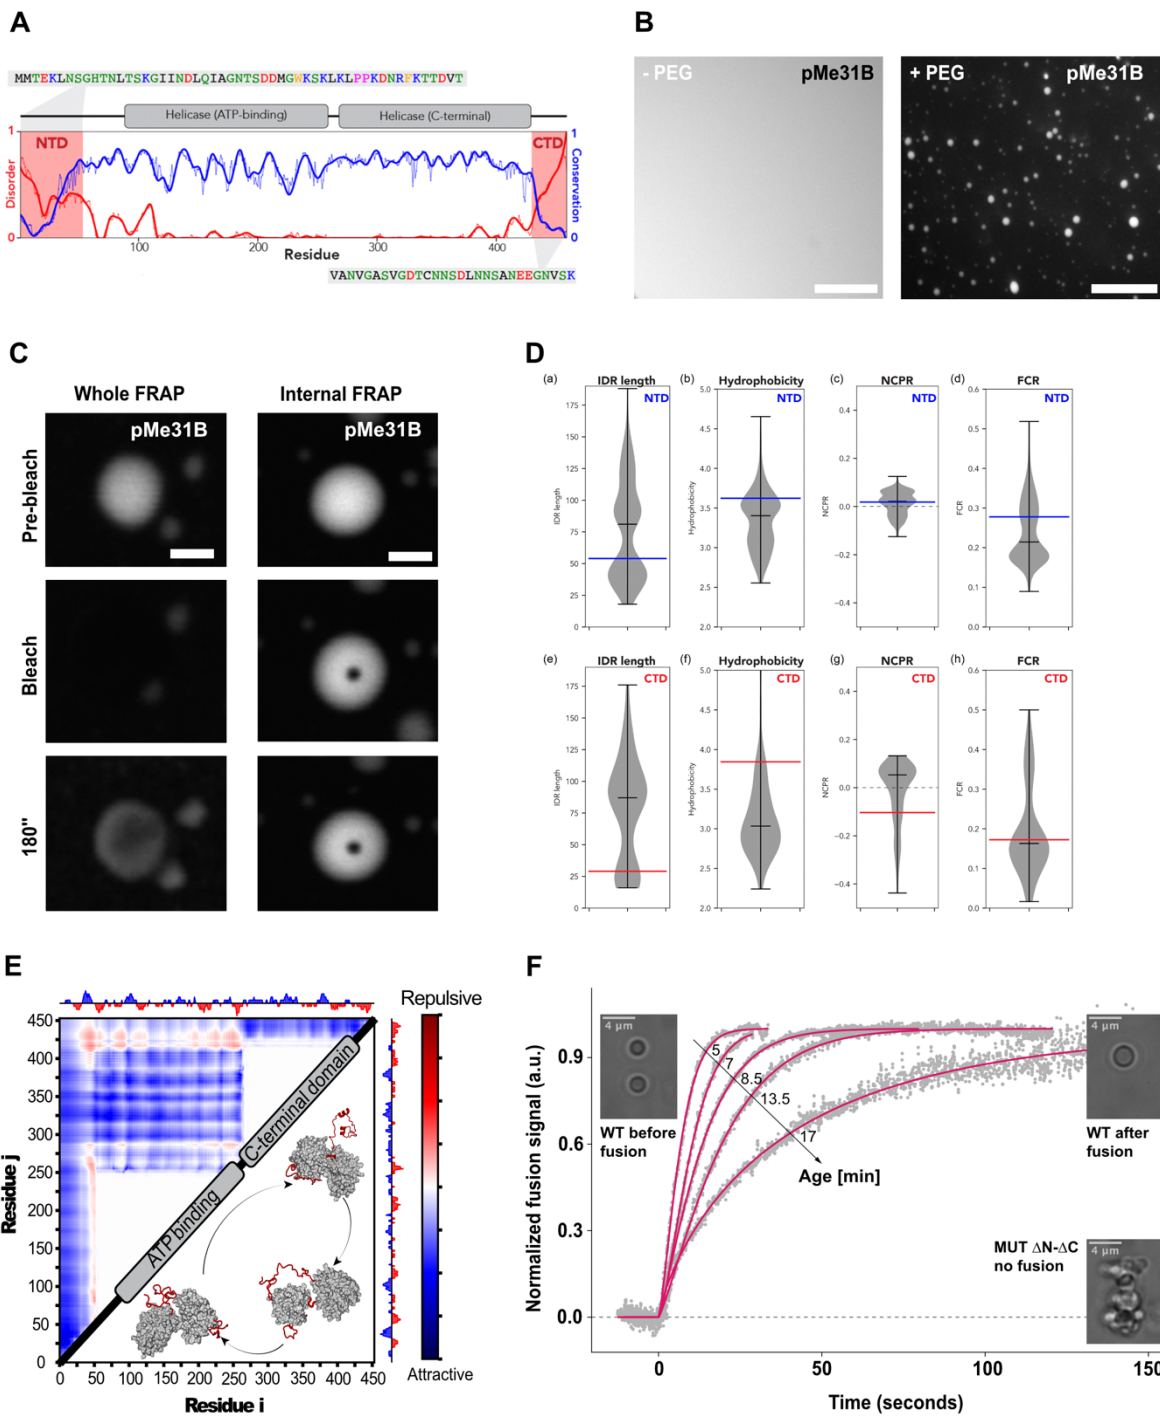

495 **Figure 4: Deletion of IDRs results in the aggregation of Me31B condensates *in***  
 496 ***vitro***

497 **(A)** Purified GFP-Me31B (pMe31B) at 7.5  $\mu$ M is diffuse on its own, but forms phase  
 498 separated spherical condensates in the presence of 1% PEG. Maximum projection 5  
 499  $\mu$ m.

500 **(B)** Time series of pMe31B condensates subjected to FRAP experiments. Whole P  
501 body photobleaching shows moderate fluorescence recovery, while internal FRAP  
502 shows no recovery.

503 **(C)** Violin plots quantify density of IDR length (a/e), hydrophobicity (b/f), Net charge  
504 per residue (c/g) and fraction of charged residues (d/h) for the N-terminal IDRs (a-d)  
505 or C-terminal IDRs (e-h). Blue or red bars define the associated value for the Me31B  
506 IDR in the N- or C-terminal IDR, respectively.

507 **(D)** Overview of disordered, conservation, and domain architecture for Me31B.  
508 Conservation calculated across 566 orthologous sequences. CTD and NTD  
509 sequences are highlighted, with an atomistic model of the full-length protein shown  
510 below.

511 **(E)** Summary of all-atom simulations. Normalized inter-residue distance is shown, with  
512 cooler colors reflecting attractive interactions and warmer colors reflecting repulsive  
513 interactions. Normalized distances are calculated based on the expected distance for  
514 a self-avoid polymer model. Both the NTD and CTD engage directly with the folded  
515 domains in a distributed and transient manner. Interactions are relatively uniform  
516 across the folded domain surface.

517 **(F)** Fusion of pMe31B condensates (magenta) at different time points post  
518 condensation, quantified by dual-trap optical tweezers. pMe31B  $\Delta$ N- $\Delta$ C condensates  
519 (dashed line) do not fuse and rapidly aggregate with each other.

520 Scale bar = 5 $\mu$ m (A,F), 2.5 $\mu$ m (B).

521 **FIGURE 5**

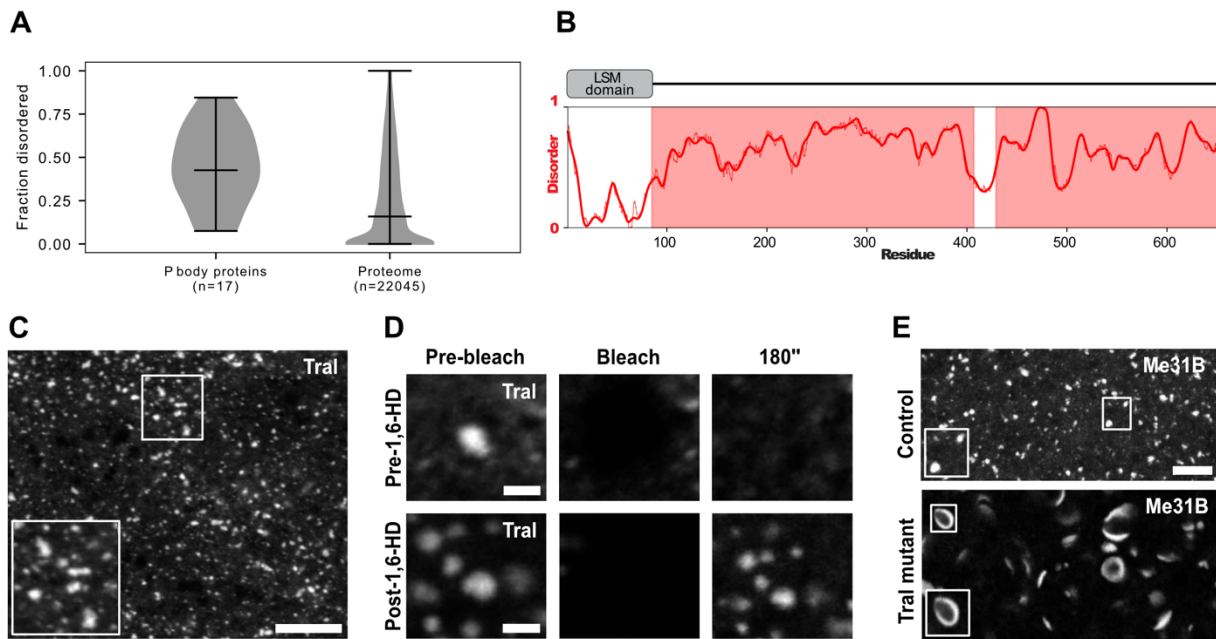

522 **Figure 5: Absence of Tral alters P body morphology in the mature oocyte**

523 **(A)** Comparison of fraction disorder in known *Drosophila* P body proteins (left)  
524 compared to whole *Drosophila* proteome (right).

525 **(B)** Schematic of Tral domain architecture containing a structured LSM domain  
526 followed by a long stretch of highly disordered regions.

527 **(C,D)** Mature oocyte expressing GFP::Tral.

528 **(C)** Tral localizes to P body condensates with diverse morphologies and sizes,  
529 distributed throughout the oocyte cytoplasm. Maximum projection 7  $\mu\text{m}$ .

530 **(D)** Time series of FRAP experiments on GFP::Tral condensates before and after  
531 treatment with 1,6-HD. Prior to the addition of 1,6-HD, Tral condensates do not recover  
532 after photobleaching, however, Tral condensates treated with 1,6-HD show increased  
533 fluorescence recovery post photobleaching.

534 **(E)** Representative mature oocytes expressing Me31B::GFP, control (*tral*<sup>1</sup> / + or  
535 *Df(3L)ED4483* / +) displaying close to spherical P body condensates. In the absence  
536 of Tral (*tral*<sup>1</sup> / *Df(3L)ED4483*), Me31B forms aberrant rod and doughnut shaped P body  
537 condensates. Maximum projection 5  $\mu\text{m}$ .

538 Scale bar = 5 $\mu\text{m}$  (C,E), 1.5 $\mu\text{m}$  (D).

539 **FIGURE 6**

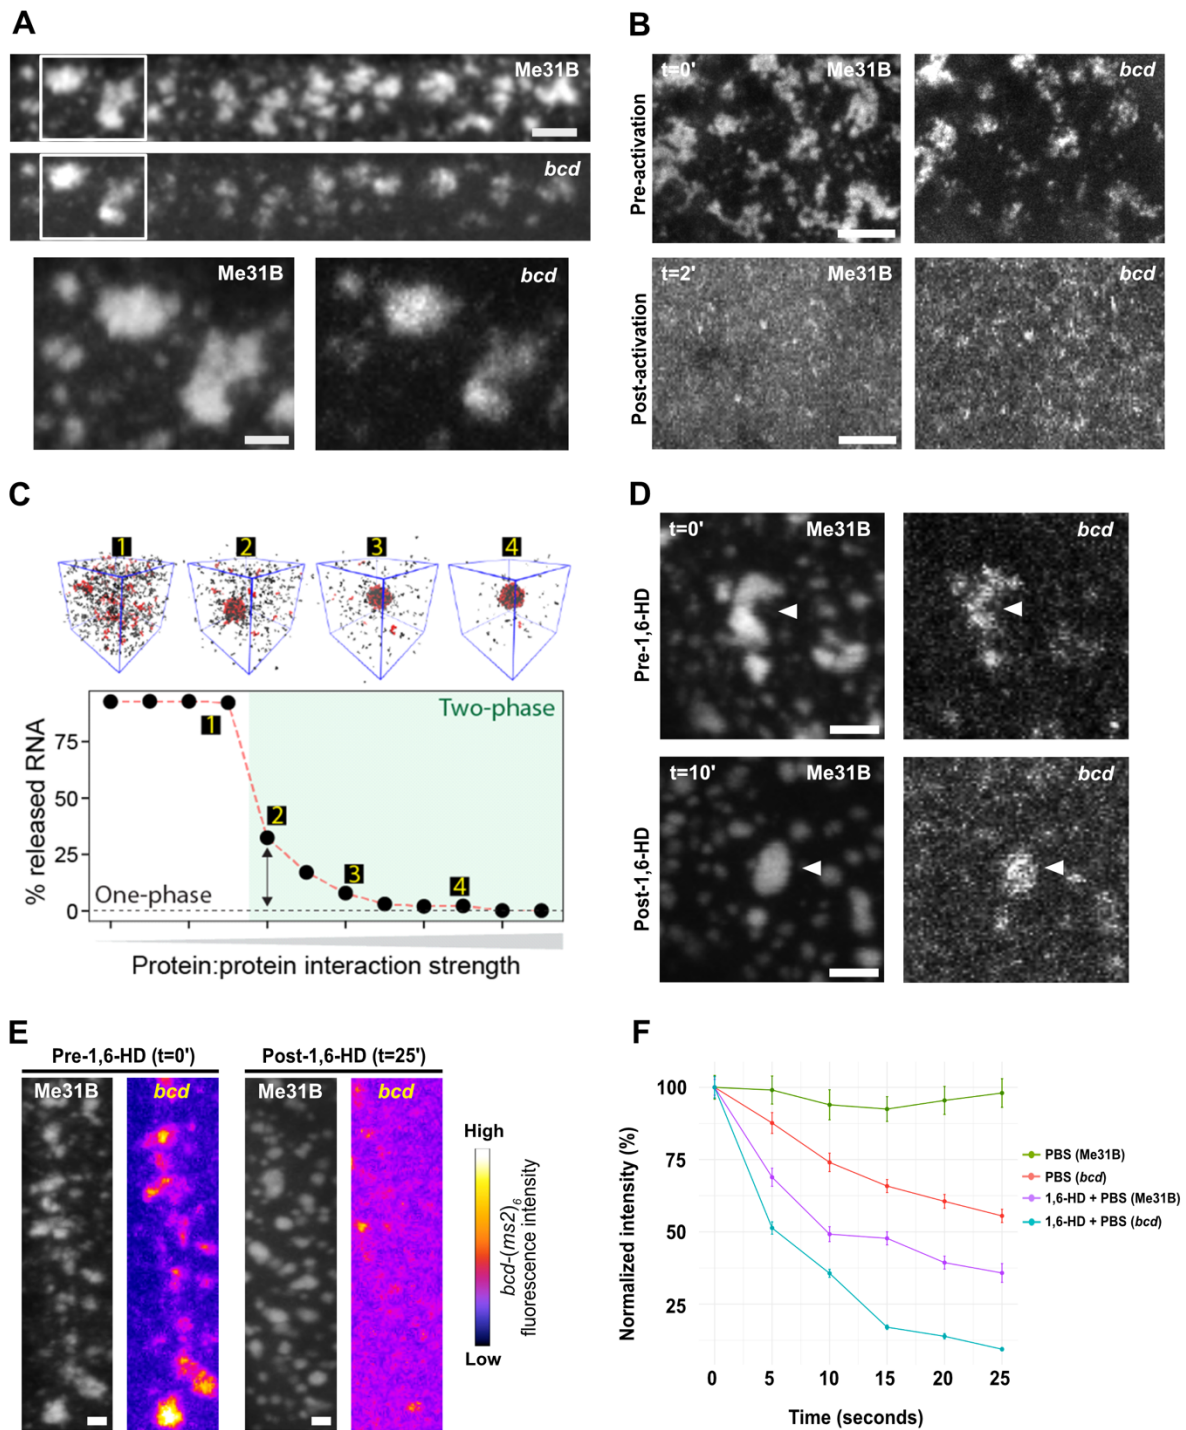

540 **Figure 6: Altering P body physical state leads to premature loss of *bcd***  
 541 **association with P bodies**

542 **(A,B,D,E)** Mature oocyte expressing Me31B::GFP, *hsp83-MCP-RFP* and *bcd-(ms2)<sub>6</sub>*.  
 543 **(A)** High resolution image of *bcd* mRNA co-localizing with P bodies at the anterior  
 544 region of the mature oocyte. Inset shows a zoomed in version of *bcd* mRNA and P  
 545 body association. Maximum projection 5  $\mu$ m.



546 **(B)** Upon addition of activation buffer, P bodies and *bcd* mRNA simultaneously  
547 undergo dispersion from condensed (t=0') to diffused state (t=2'). Maximum projection  
548 5  $\mu\text{m}$ .

549 **(C)** Coarse-grained simulations performed with 50 RNA molecules 800 protein  
550 molecules in which condensate assembly is driven by both protein:protein and  
551 protein:RNA interactions. When condensates have formed, the fraction of free (dilute  
552 phase) RNA is determined by both protein:protein and protein:RNA interaction  
553 strength.

554 **(D)** Addition of 1,6-HD causes P bodies and *bcd* mRNA to initially adopt a spherical  
555 morphology (t=10'), representative of a more dynamic physical state. Maximum  
556 projection 5  $\mu\text{m}$ .

557 **(E)** Extended exposure to 1,6-HD results in dispersion of *bcd* mRNAs whereas P  
558 bodies remain condensed (t=25'). Maximum projection 5  $\mu\text{m}$ .

559 **(F)** Quantification of P body and *bcd* mRNA fluorescence in the presence of PBS (n =  
560 37 Me31B and *bcd* particles) or 1,6-HD (n = 71 Me31B and *bcd* particles).

561 Scale bar = 2.5 $\mu\text{m}$  (A), 5 $\mu\text{m}$  (B,D), 2 $\mu\text{m}$  (E).

562 **FIGURE 7**

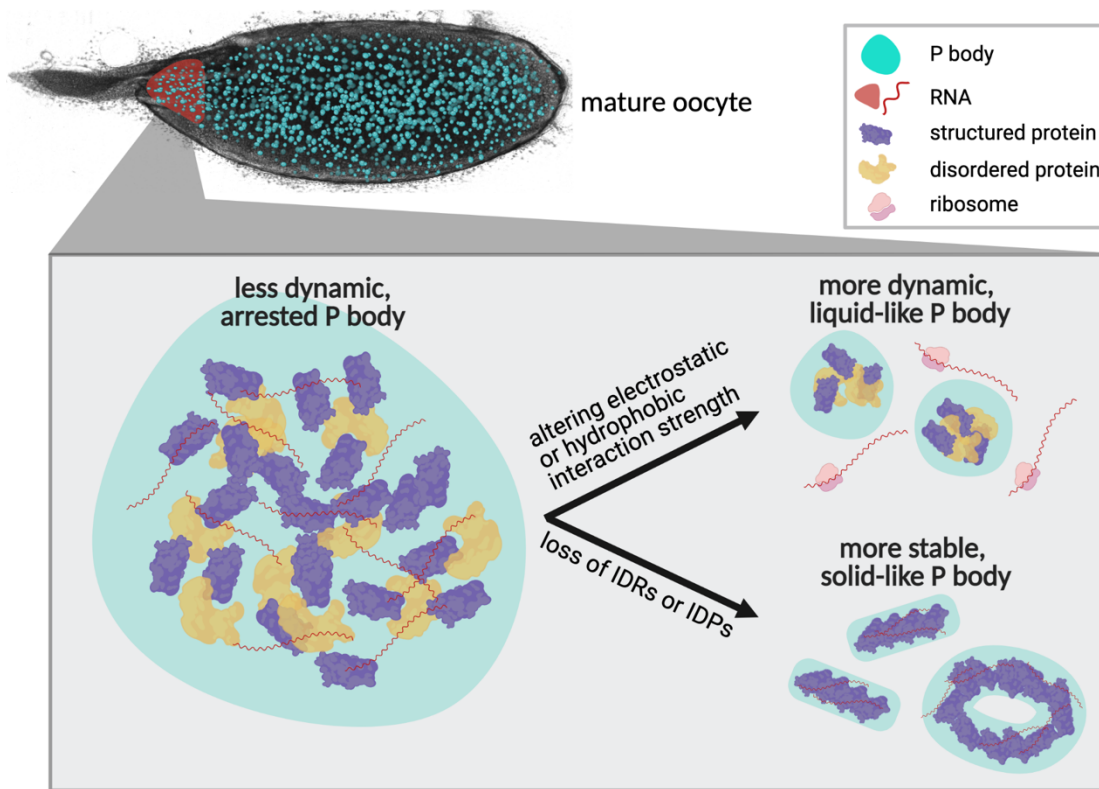

563 **Figure 7: Regulation of P bodies in the mature *Drosophila* oocyte**

564 P bodies (cyan) distributed throughout the mature *Drosophila* oocyte adopt a less  
565 dynamic, arrested physical state. The assembly, organization and physical properties  
566 of P bodies are regulated by synergistic interactions between structured (purple) and  
567 disordered proteins (yellow), as well as RNAs, predominantly via weak intermolecular  
568 hydrophobic and electrostatic interactions. Altering the strength of these interactions  
569 can lead to more dynamic, liquid-like P bodies and result in the release, and  
570 subsequent translation, of stored mRNAs (red). Alternatively, loss of IDRs or IDPs  
571 results in the formation of morphologically aberrant, solid-like protein-RNA aggregates  
572 which likely interfere with mRNA storage and translational regulation. Created with  
573 BioRender.com

574 **FIGURE S1**

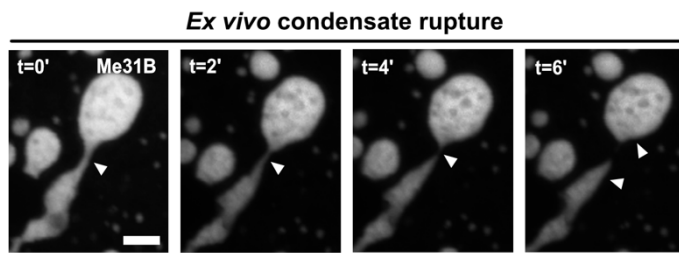

575 **Figure S1: Extruded P bodies display rupture behavior**

576 Time series of P bodies extruded from the mature oocyte are first held together by a  
577 transient 'bridge' after fusion. The P bodies then undergo a process of 'pinching off' of  
578 the bridge (white arrowheads point to the region of rupture). The two P bodies resorb  
579 within a minute of bridge rupturing. Scale bar: 5 $\mu$ m.

580 **FIGURE S2**

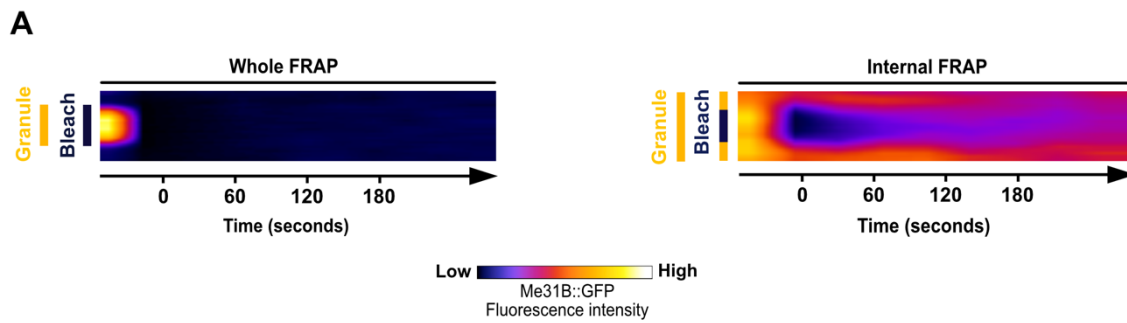

**B**

| Experiment    | Tau (seconds) | Mobile fraction | Immobile fraction |
|---------------|---------------|-----------------|-------------------|
| Whole FRAP    | 94.86         | 0.087           | 0.913             |
| Internal FRAP | 144.12        | 0.714           | 0.285             |

581 **Figure S2: Me31B is mobile within P bodies but not between the cytoplasm and**  
582 **P bodies**

583 **(A)** Kymograph of P body whole FRAP shows no recovery, while kymograph of P  
584 bodies post-internal FRAP displays recovery from the periphery to the center. This  
585 pattern is indicative of diffusion mediated recovery.

586 **(B)** The tau, mobile and immobile fractions of Me31B after whole FRAP and internal  
587 FRAP experiment. These data show that Me31B is more mobile internally than  
588 between the P body and cytoplasm.

589 **FIGURE S3**

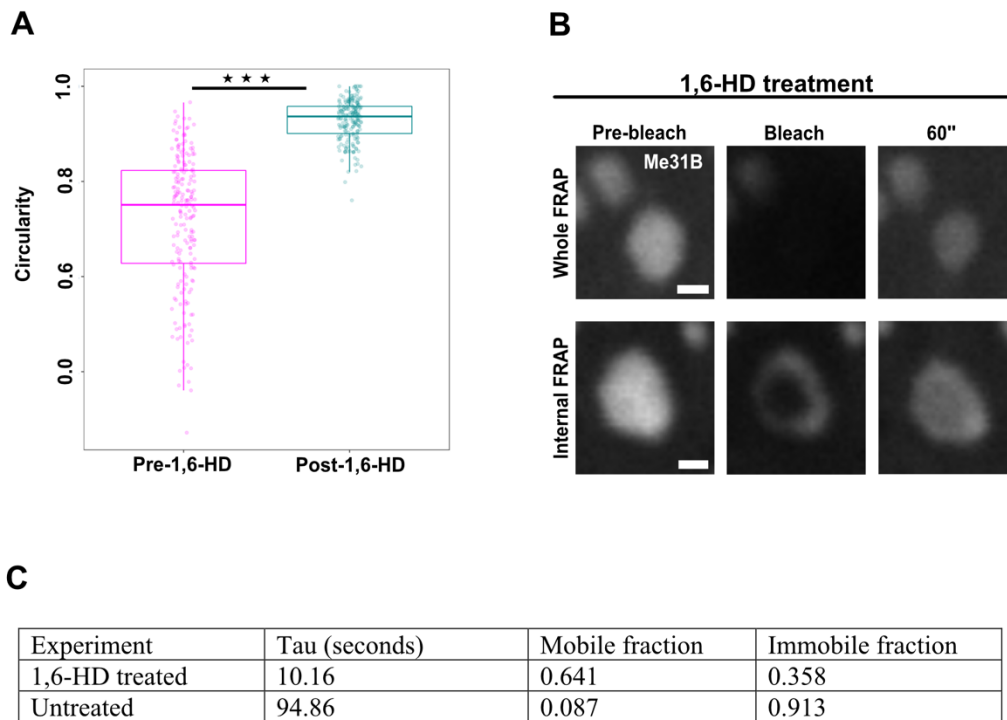

590 **Figure S3: 1,6-HD induces transition of P bodies to a more dynamic physical**  
591 **state**

592 **(A)** Quantification of P body circularity before and after 1,6-HD treatment shows a  
593 significant increase in spherical morphology of P body post-treatment (Wilcoxon  
594 signed-rank test,  $n = 200$ ).

595 **(B)** Time series of P body condensates subjected to whole or internal FRAP post 1,6-  
596 HD treatment, both displaying rapid fluorescence recovery ( $n = 12$  whole FRAP,  $n = 3$   
597 internal FRAP.) Scale bar:  $3\mu\text{m}$ .

598 **(C)** The tau, mobile and immobile fractions of Me31B after whole FRAP with or without  
599 the addition of 1,6-HD. These data show that Me31B is highly mobile between the P  
600 body and cytoplasm post-treatment.

601 **FIGURE S4**

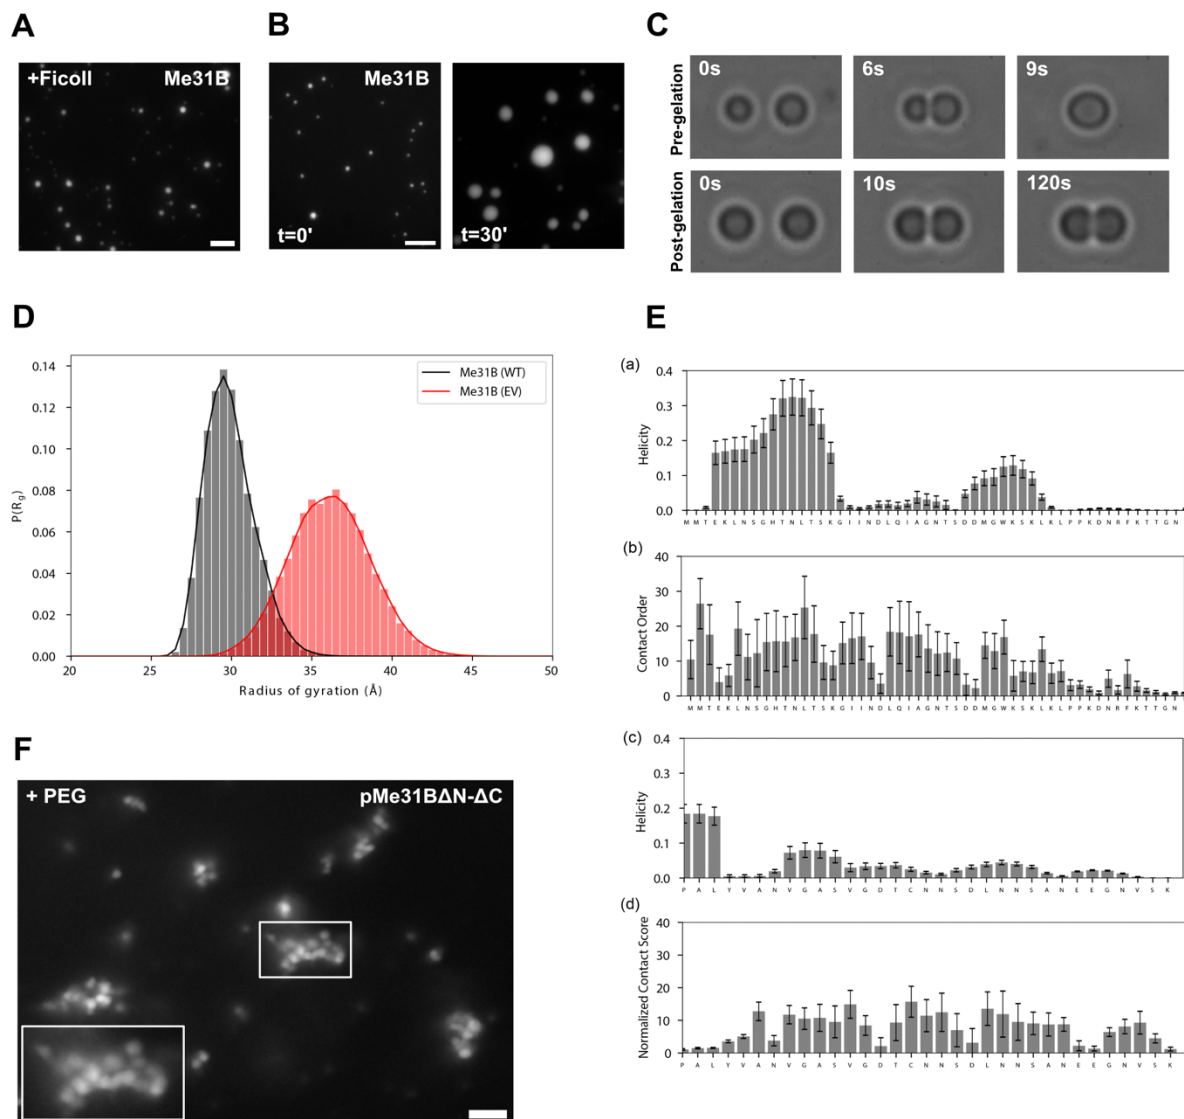

602 **Figure S4: Interaction of IDRs with folded domains regulates Me31B physical**  
 603 **state *in vitro***

604 **(A)** 7.5  $\mu\text{m}$  purified GFP-pMe31B in the presence of 1% Ficoll readily forms phase  
 605 separated condensates.

606 **(B)** Time series of purified GFP-pMe31B (7.5  $\mu\text{m}$ ) shows increase in size of  
 607 condensates over 30 minutes.

608 **(C)** Time series of GFP-pMe31B condensate coalescence using optical traps. Rapid  
 609 fusion of condensates is observed pre-gelation while condensates fail to fuse post-  
 610 gelation.

611 **(D)** Black bars show the  $R_g$  distribution for full-length Me31B under standard  
 612 simulation conditions (full Hamiltonian (WT)), while red bars show the analogous

613 distribution of the radius of gyration for simulations performed in which all attractive  
614 interactions are turned off (excluded volume (EV)). The full Hamiltonian simulations  
615 are substantially more compact, with an ensemble average radius of gyration of 30.1  
616 Å, compared to 36.4 Å for the EV simulations. This compaction of the global  
617 dimensions originates from favorable interaction between the two IDRs and the folded  
618 domains.

619 **(E)** Local helicity (a,c) and intramolecular contacts (b,d) quantified on a per-residue  
620 basis for the NTD (a,b) and CTD (c,d). The NTD possess two short transient helices  
621 (4-17 and 31-37), while the CTD is entirely devoid of secondary structures. The NTD  
622 engages in more extensive intramolecular interactions than the CTD, as quantified by  
623 the normalized contact score (d) (see methods, larger values mean more contacts per  
624 residue). In both cases, the IDRs engage relatively uniformly, as opposed to via a  
625 specific motif. This implies broad and non-specific interactions between the IDRs and  
626 the folded domains.

627 **(F)** pMe31B with both IDRs deleted (pMe31B  $\Delta$ N- $\Delta$ C), in the presence of 1% PEG,  
628 fails to coalesce and rather forms amorphous aggregates.

629 Scale bar = 5 $\mu$ m (A,B,F), 1.5  $\mu$ m (C).

630 **FIGURE S5**

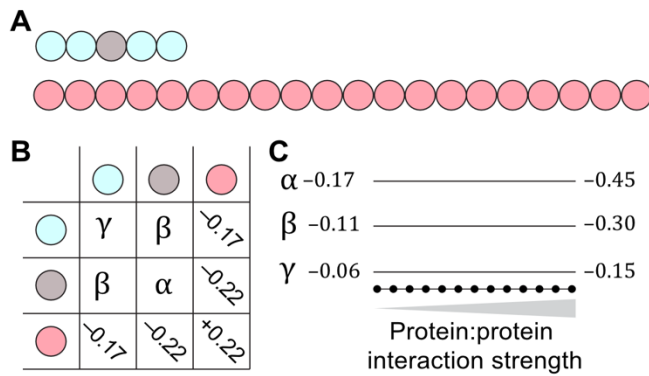

631 **Figure S5: Schematic of course-grained simulations**

632 **(A)** Topology of Me31b (top) and RNA (bottom) molecules used in coarse-grained  
 633 simulations.

634 **(B)** Basic interaction table showing relative bead-bead interaction strengths with  
 635 protein:protein bead interactions defined in terms of parameters.

636 **(C)** Protein:protein interaction parameters scale uniformly between max and min  
 637 values.



## 638 **MATERIALS AND METHODS**

### 639 ***Drosophila* stocks**

640 The following transgenic lines were used in this paper:

641 Me31B::GFP (BL 51530, (Buszczak et al., 2007)), *hsp83-MCP-RFP* and *bcd-(ms2)<sub>6</sub>*  
642 (Weil et al., 2006), GFP::Tral (DGRC 110584, (Morin et al., 2001)), *tral<sup>1</sup>* (BDSC 14933)  
643 and *Df(3L)ED4483* (BDSC 8070) (Wilhelm et al., 2005).

644 Fly stocks were maintained at 25°C on Iberian recipe fly food as per standard  
645 procedure. For mature oocytes experiments, female flies were fed on yeast for two  
646 days at 25°C prior to dissection.

### 647 **Sample preparation**

648 Mature oocytes from fattened female flies were dissected into halocarbon oil on a  
649 22mm by 40mm cover slip for live imaging. For extrusion assays, membranes of  
650 dissected mature oocytes were poked and ruptured using sharp forceps to extrude the  
651 oocyte contents into the oil. Extruded material was then subjected to live imaging.

### 652 **Live imaging**

653 Live imaging of *in vivo* and *ex vivo* P bodies, including all Fluorescent Recovery After  
654 Photobleaching experiments, were performed on the Olympus FV3000 microscope  
655 using the 1.35 NA, 60X silicone objective. Live imaging of recombinant Me31B  
656 condensates, induced on 35mm glass bottom MatTek dishes, was performed on the  
657 DeltaVision Core widefield microscope using a 1.4 NA, 60X oil immersion objective.

### 658 **Pharmacological treatments**

659 Mature oocytes mounted in oil on a 22 by 40mm coverslip and set up under the  
660 microscope were treated with one or two drops of 10 µg/ml cytochalasin-D (Sigma-  
661 Aldrich) or 5% 1,6 hexanediol (Sigma-Aldrich) or 500ng/ml RNase A (Sigma-Aldrich)  
662 mixed in 1X Dulbecco's Phosphate-buffered saline (PBS) solution without MgCl<sub>2</sub>  
663 (Sigma-Aldrich), or home-made activation buffer (3.3mM NaH<sub>2</sub>PO<sub>4</sub>, 16.6mM KH<sub>2</sub>PO<sub>4</sub>,  
664 10mM NaCl, 50mM KCl, 5% PEG 8000, 2mM CaCl<sub>2</sub>, pH 6.4; York-andersen *et al.*,  
665 2015) using a glass pipette. Me31B or Tral labelled P bodies before and after treatment  
666 were then imaged. For salt experiments, mature oocytes were extruded into various  
667 concentrations of MgCl<sub>2</sub> or NaCl mixed in 1X PBS for 15 minutes before being  
668 subjected to live imaging. In the case of excessive movement of the oocytes or

669 extruded material during addition of solutions, the focal plane of interest was adjusted  
670 accordingly, and imaging was performed.

### 671 **Protein purification**

672 Recombinant GFP-Me31B, both the wild-type (WT) and the Me31B $\Delta$ N- $\Delta$ C (mutant),  
673 were expressed in and purified from insect cells using the FlexiBAC baculovirus vector  
674 system (Lemaitre et al. 2019). Cell lysis was performed using a LM20 microfluidizer in  
675 lysis buffer containing 50mM Tris/HCl pH 7.6, 2mM EDTA, 1x EDTA-containing  
676 protease inhibitor cocktail (Roche), 1M KCl, 5% glycerol, 10mM imidazole, 3 ug/L  
677 Benzonase, 1 mM DTT. The soluble lysate fraction was collected after centrifugation  
678 for 1 hour at 16000 rpm (Beckman Coulter JA-25.50) at 4°C. MBP-tagged protein was  
679 captured by gravity flow affinity chromatography using amylose resin (New England  
680 Biolabs). Captured protein was washed with wash buffer (50mM Tris/HCl pH 7.6, 2mM  
681 EDTA, 1M KCl, 5% glycerol, 10mM imidazole, 1 mM DTT, 3 ug/L Benzonase) and  
682 eluted using wash buffer containing 20mM maltose. The eluted protein was incubated  
683 with GST 3C- precision protease (1:50) at room temperature for 2 hours to cleave off  
684 affinity tags. Samples were applied to size exclusion chromatography using a HiLoad  
685 16/600 Superdex 200 pg (GE Life Sciences) on an Akta pure chromatography system  
686 in 50mM Tris/HCl pH 7.6, 2mM EDTA, 1M KCl, 5% glycerol, 1 mM DTT. Proteins were  
687 finally concentrated using an Amicon Ultra centrifugal-500-30K filter at 4000 xg.  
688 Aliquots were flash frozen and stored at -80°C.

### 689 ***In vitro* phase separation assay**

690 Stored protein samples were thawed and spun to remove any residual precipitates.  
691 To induce phase separation of Me31B condensates (WT and mutant), 7.5  $\mu$ M  
692 recombinant GFP-Me31B protein was added to an eppendorf tube containing the  
693 phase separation buffer (50mM KCl, 20mM PIPES, pH 7, 1% PEG-3K). Note: Gentle  
694 tapping of the tube induced phase separated, spherical condensates. Avoid mixing the  
695 content with a pipette tip as it induces aggregate formation.

### 696 **Optical tweezer experiments**

697 Condensate fusions for wildtype or mutant condensates were quantified using a  
698 custom built dual-trap optical tweezer instrument (Jahnel et al., 2011). Condensates  
699 were induced in the phase separation buffer containing 5% PEG-3K at the following  
700 concentrations protein concentrations: For both WT and mutant condensates, 20  $\mu$ M

701 Me31B was used. Post condensation, two condensates were trapped using two  
702 separate optical traps and brought into close contact to induce fusion.  
703 For quantifying the scaled fusion time for WT condensates, firstly, a relaxation time  
704 constant was derived from the fusion process over time. The scaled fusion time was  
705 then calculated by dividing the time constant by condensate radii to express the fusion  
706 time as a function independent of condensate size. For mutant condensates, due to  
707 their rapid aggregation post condensation, fusion was not quantifiable.

### 708 **Fluorescence Recovery After Photobleaching (FRAP)**

709 For whole FRAP, Me31B/Tral labeled P bodies or *in vitro* Me31B condensates were  
710 entirely photobleached for 5 seconds using 40% laser intensity from the 405nm laser  
711 channel. For internal FRAP, a small region within Me31B labeled *in vivo* P bodies or  
712 *in vitro* Me31B condensates was photobleached for 5 seconds using 40% laser  
713 intensity from the 405nm laser channel. Time lapse series of Me31B fluorescence  
714 recovery was recorded every 30 seconds (*in vivo* P bodies) or 10 seconds (*in vitro*  
715 Me31B condensates) using the pre-bleach imaging parameters (minimal laser  
716 intensity using the 488nm laser channel, 2 Airy unit pinhole, 2048\*2048 pixels). Mean  
717 fluorescence intensities were estimated using the Fiji ImageJ software. For whole  
718 FRAP analysis, background correction was performed by dividing Me31B fluorescent  
719 intensities of bleached condensates by fluorescent intensities of unbleached,  
720 cytoplasm. For internal FRAP, background correction was performed by dividing  
721 Me31B fluorescent intensities of bleached region within condensates by fluorescent  
722 intensities of whole condensates.

723 For all FRAP series, statistical analysis, curve fitting and plotting was performed using  
724 Rstudio/R software. Data for each condition was averaged and standard deviation was  
725 calculated where applicable. Recovery fitting of the normalized mean intensity as  
726 function of time was fitted by the least square analysis to determine fit to the single  
727 exponential equation: Normalized intensity =  $P \times (1 - e^{-t/\tau}) + y_0$  where  $y_0$  is the  
728 recovery plateau,  $t$  is time,  $\tau$  is the time constant and  $P$  is the amplitude of the  
729 fluorescence change.

730 To infer the spatiotemporal pattern of fluorescence recovery, kymographs were  
731 produced using the ImageJ plugin 'reslice' by measuring fluorescence across of a  
732 region of interest over time.

733 **Fluorescence intensity measurements**

734 Analysis of Me31B and *bcd* fluorescence before and after 1,6-HD treatment was  
735 performed using ImageJ processing software. Identical imaging parameters were  
736 utilized during imaging and measurement of fluorescence using ‘analyze particles’ and  
737 ‘measure’ feature on ImageJ. Individual Me31B and *bcd* particles were manually  
738 counted and analyzed before and after treatment with 1,6-HD.

739 **All-atom simulations**

740 All-atom simulations were run with the ABSINTH implicit solvent model and the  
741 CAMPARI Monte Carlo simulation (V3.0)  
742 (<http://campari.sourceforge.net/V3/index.html>) and with the ion parameters derived by  
743 Mao *et al* (Mao and Pappu, 2012; Vitalis and Pappu, 2009). Preferential sampling is  
744 used such that the backbone dihedral angles of folded domains are held fixed, while  
745 all sidechain dihedral angles and the backbone dihedrals of folded proteins are fully  
746 sampled. In this way we *a priori* ensure that the folded domains remain folded. While  
747 the combination of ABSINTH and CAMPARI is well-established route to obtain reliable  
748 ensembles of disordered regions, more positional restraints on folded domains have  
749 been used previously applied to obtain good agreement with experiment (Cubuk *et al.*,  
750 2020; Martin and Mittag, 2018; Martin *et al.*, 2020; Newcombe *et al.*, 2018).

751 Starting structures were generated first by constructing homology models of Me31B  
752 based on the DDX6 structure (PDB: 4CT5) using SWISS-MODEL (Waterhouse *et al.*,  
753 2018). N- and C-terminal IDRs were constructed using CAMPARI. For all simulations,  
754 disordered regions were started from randomly generated non-overlapping random-  
755 coil conformations, with each replica using a unique starting structure. Monte Carlo  
756 simulations evolve the system via a series of moves that perturb backbone and  
757 sidechain dihedral angles along with the rigid-body coordinates of both polypeptides  
758 and explicit ions. Simulation analysis was performed using CAMPARITraj  
759 ([www.ctrj.com](http://www.ctrj.com)) and MDTraj (McGibbon *et al.*, 2015). The protein secondary structure  
760 was assessed using the DSSP algorithm (Kabsch and Sander, 1983).

761 Contact score analysis was performed by assessing the fraction of simulations in  
762 which two residues were in direct contact, a distance calibrated as 5.0 Å or shorter  
763 between heavy atoms. This fraction was divided by the analogous fraction computed  
764 from simulations in which all attractive molecular interactions (solvation effects,

765 electrostatics, attractive component of the Lennard-Jones potential) were set to 0.0, in  
766 the so-called excluded volume (EV) limit (Holehouse et al., 2015).

767 All simulations were run at 10 mM NaCl and 310 K. Fifty independent simulations were  
768 run for a total of 80 million Monte Carlo steps with 5 million steps for equilibration. The  
769 system state saved every 100,000 steps. Each simulation generated 750 frames,  
770 generating a final ensemble of 37,500 frames. Where included, error bars are standard  
771 error of the mean over the fifty independent simulations.

## 772 **Bioinformatics**

773 Disordered regions were calculated using both Mobidb-lite 1 and with metapredict 2,3.  
774 Disordered regions were identified using consensus scores from Mobidib-lite with a  
775 minimum IDR length of 25 residues and 3 or more predictors predicting a region to be  
776 disordered. The raw set of disordered regions from the drosophila proteome, along  
777 with analogous data for P body proteins is provided in the supplementary repository:  
778 [https://github.com/holehouse-](https://github.com/holehouse-lab/supportingdata/tree/master/2021/sankaranarayanan_me31b_2021)  
779 [lab/supportingdata/tree/master/2021/sankaranarayanan\\_me31b\\_2021.](https://github.com/holehouse-lab/supportingdata/tree/master/2021/sankaranarayanan_me31b_2021)

780 Sequence analysis was performed using localCIDER4,5.

## 781 **Coarse-grained simulations**

782 Coarse-grained simulations were performed with the PIMMS simulation engine. 6,7.  
783 Lattice-based Monte Carlo simulations afford a computationally tractable approach to  
784 sample systems with coexisting liquid phases, as has been applied in several different  
785 contexts 7–10. Monte Carlo moves include chain translate, rotate, and local/global  
786 pivot moves.

787 Simulations were run using a simple representation scheme in which Me31b was  
788 represented as a five-bead model made up of two N-terminal beads, a single central  
789 bead, and two C-terminal beads (Figure S4GA). In this way, the protein consists of  
790 intrinsically disordered region (IDR) beads and ordered domain (OD) beads. RNA is  
791 represented as a 20-bead homopolymer (Figure S4GA). We emphasize that these  
792 models are designed to describe a class of phenomenon, as opposed to capturing  
793 features specific to Me31b over RNA binding proteins. Our simplification of RNA and  
794 protein notwithstanding, these simple models allow us to interrogate general  
795 behavior.

796 The strength of interactions between the three bead types is shown in Figure S4GB  
797 and SXC. Units are in per kT (where  $k=1$ ). The core keyfiles and parameter files used  
798 to run these simulations are provided at [https://github.com/holehouse-](https://github.com/holehouse-lab/supportingdata/tree/master/2021/sankaranarayanan_me31b_2021)  
799 [lab/supportingdata/tree/master/2021/sankaranarayanan\\_me31b\\_2021](https://github.com/holehouse-lab/supportingdata/tree/master/2021/sankaranarayanan_me31b_2021).

800 For protein:RNA and RNA:RNA interaction strengths are held fixed across all  
801 simulations, while the protein:protein interaction strength is systematically altered  
802 across the simulations shown in Figure S4GC. The specific interaction strengths were  
803 chosen to qualitatively reflect insights from experimental work - i.e. OD:OD interaction  
804 is stronger than OD:IDR interaction, with IDR:IDR interaction being the weakest. We  
805 also assume both OD and IDR beads can interact with RNA, and that RNA:RNA  
806 interaction is repulsive. As a final note, we anticipate that RNA:RNA interactions plays  
807 an additional role in P body stability, assembly, and disassembly. However, for our  
808 initial simple model, absent of other specific information, we avoided adding more  
809 tunable parameters to develop a simple yet physically reasonable.

810 All simulations were run with 800 Me31b protein molecules. Simulations with RNA  
811 were also run with 50 RNA molecules. These numbers were chosen to ensure that  
812 reasonable statistics on droplet recruitment could be obtained with a sufficiently large  
813 system where bona fide phase separation occurs. Simulations were run on a 60 x 60  
814 x 60 lattice with periodic boundary conditions, and simulation analysis was performed  
815 on the terminal 20% of the frames. Simulations were run for around 2.5 billion Monte  
816 Carlo moves, and three independent replicas were performed, such that error bars are  
817 the standard error of the mean on these replicas.

818 **ACKNOWLEDGEMENTS**

819 We thank the Bloomington Drosophila Stock Center, Ilan Davis, Liz Gavis, James  
820 Wilhelm and William Chia for fly stocks. We are grateful to Paul Conduit for  
821 experimental advice; Titus Franzmann for advice on FRAP analysis, discussions and  
822 feedback on the manuscript; the Zoology Imaging Facility for assistance and support  
823 with microscopy; Protein Purification Facility at the MPI-CBG, Dresden; and funding  
824 from the University of Cambridge ISSF (097814) and the Wellcome Trust  
825 (200734/Z/16/Z) (to TTW), INLAKS and Cambridge Trust scholarship (to M.S.), and  
826 EMBO short-term fellowship, Sidney Sussex College, and Company of Biologists  
827 grants for travel and accommodation at the MPI-CBG, Dresden (to M.S.).

828 **AUTHOR CONTRIBUTIONS**

829 M.S. performed the majority of experiments. M.S. and T.T.W. designed the majority of  
830 the experiments. R.J.E. and A.S.H. performed all simulations and *in silico* modeling.  
831 I.R.E.A.T. assisted with protein purification. M.J. performed the optical tweezer  
832 experiments. M.S., R.J.E., M.J., M.W., and A.S.H. analyzed the data. M.S. and T.T.W.  
833 wrote the manuscript. M.S., A.S.H., S.A. and T.T.W. edited the manuscript.

834 **CONFLICT OF INTERESTS**

835 S.A. is an advisor on the scientific advisory board of Dewpoint Therapeutics. A.S.H.  
836 is a scientific consultant with Dewpoint Therapeutics.

837 **REFERENCES**

- 838 1. Andersen, A.H.Y., Wolfner, M.F., Wood, B.W., and Weil, T.T. (2020). A calcium -  
839 mediated actin redistribution at egg activation in *Drosophila*. 293–304.
- 840 2. Andrei, M.A., Ingelfinger, D., Heintzmann, R., Achsel, T., Rivera-pomar, R., and  
841 Lührmann, R. (2005). A role for eIF4E and eIF4E-transporter in targeting mRNPs  
842 to mammalian processing bodies. 717–727.
- 843 3. Bakthavachalu, B., Huelsmeier, J., Sudhakaran, I.P., Hillebrand, J., Singh, A.,  
844 Petrauskas, A., Thiagarajan, D., Sankaranarayanan, M., Mizoue, L., Anderson,  
845 E.N., et al. (2018). RNP-Granule Assembly via Ataxin-2 Disordered Domains Is  
846 Required for Long-Term Memory and Neurodegeneration. *Neuron* 98, 754-766.e4.
- 847 4. Banani, S.F., Lee, H.O., Hyman, A.A., and Rosen, M.K. (2017). Biomolecular  
848 condensates: Organizers of cellular biochemistry. *Nat. Rev. Mol. Cell Biol.* 18, 285–  
849 298.
- 850 5. Boeynaems, S., Alberti, S., Fawzi, N.L., Mittag, T., Polymenidou, M., Rousseau,  
851 F., Schymkowitz, J., Shorter, J., Wolozin, B., Van Den Bosch, L., et al. (2018).  
852 Protein Phase Separation: A New Phase in Cell Biology. *Trends Cell Biol.* 28, 420–  
853 435.
- 854 6. Boeynaems, S., Holehouse, A.S., Weinhardt, V., Kovacs, D., Van Lindt, J.,  
855 Larabell, C., Bosch, L. Van Den, Das, R., Tompa, P.S., Pappu, R. V., et al. (2019).  
856 Spontaneous driving forces give rise to protein–RNA condensates with coexisting  
857 phases and complex material properties. *Proc. Natl. Acad. Sci. U. S. A.* 116, 7889–  
858 7898.
- 859 7. Boke, E., Ruer, M., Wühr, M., Coughlin, M., Lemaitre, R., Gygi, S.P., Alberti, S.,  
860 Drechsel, D., Hyman, A.A., and Mitchison, T.J. (2016). Amyloid-like Self-Assembly  
861 of a Cellular Compartment. *Cell* 166, 637–650.
- 862 8. Bouveret, E. (2000). A Sm-like protein complex that participates in mRNA  
863 degradation. *EMBO J.* 19, 1661–1671.
- 864 9. Brangwynne, C.P., Eckmann, C.R., Courson, D.S., Rybarska, A., Hoege, C.,  
865 Gharakhani, J., Jülicher, F., and Hyman, A.A. (2009). Germline P granules are  
866 liquid droplets that localize by controlled dissolution/condensation. *Science* (80- ).



- 867 324, 1729–1732.
- 868 10. Brangwynne, C.P., Mitchison, T.J., and Hyman, A.A. (2011). Active liquid-like  
869 behavior of nucleoli determines their size and shape in *Xenopus laevis* oocytes.  
870 *Proc. Natl. Acad. Sci. U. S. A.* *108*, 4334–4339.
- 871 11. Brangwynne, C.P., Tompa, P., and Pappu, R. V. (2015). Polymer physics of  
872 intracellular phase transitions. *Nat. Phys.* *11*, 899–904.
- 873 12. Buchan, J.R., Buchan, R., and Buchan, J.R. (2014). mRNP granules Assembly,  
874 function, and connections with disease. *6286*.
- 875 13. Buszczak, M., Paterno, S., Lighthouse, D., Bachman, J., Planck, J., Owen, S.,  
876 Skora, A.D., Nystul, T.G., Ohlstein, B., Allen, A., et al. (2007). The carnegie protein  
877 trap library: a versatile tool for *Drosophila* developmental studies. *Genetics* *175*,  
878 1505–1531.
- 879 14. Cubuk, J., Alston, J.J., Incicco, J.J., Singh, S., Stuchell-Breton, M.D., Ward,  
880 M.D., Zimmerman, M.I., Vithani, N., Griffith, D., Wagoner, J.A., et al. (2020). The  
881 SARS-CoV-2 nucleocapsid protein is dynamic, disordered, and phase separates  
882 with RNA. *BioRxiv*.
- 883 15. Dorone, Y., Boeynaems, S., Jin, B., Bossi, F., Flores, E., and Lazarus, E. (2020).  
884 Hydration-dependent phase separation of a prion-like protein regulates seed  
885 germination during water stress .
- 886 16. Dzuricky, M., Rogers, B.A., Shahid, A., Cremer, P.S., and Chilkoti, A. (2020). using  
887 artificial disordered proteins. *Nat. Chem.* *12*.
- 888 17. Eichhorn, S.W., Subtelny, A.O., Kronja, I., Kwasnieski, J.C., Orr-Weaver, T.L., and  
889 Bartel, D.P. (2016). mRNA poly(A)-tail changes specified by deadenylation broadly  
890 reshape translation in *Drosophila* oocytes and early embryos. *Elife* *5*, 1–24.
- 891 18. Eulalio, A., Behm-Ansmant, I., Schweizer, D., and Izaurralde, E. (2007). P-Body  
892 Formation Is a Consequence, Not the Cause, of RNA-Mediated Gene Silencing.  
893 *Mol. Cell. Biol.* *27*, 3970–3981.
- 894 19. Feric, M., Vaidya, N., Harmon, T.S., Mitrea, D.M., Zhu, L., Richardson, T.M.,  
895 Kriwacki, R.W., Pappu, R. V., and Brangwynne, C.P. (2016). Coexisting Liquid  
896 Phases Underlie Nucleolar Subcompartments. *Cell* *165*, 1686–1697.

- 897 20. Franzmann, T.M., Jahnel, M., Pozniakovsky, A., Mahamid, J., Holehouse, A.S.,  
898 Nüske, E., Richter, D., Baumeister, W., Grill, S.W., Pappu, R. V., et al. (2018).  
899 Phase separation of a yeast prion protein promotes cellular fitness. *Science* (80).  
900 359.
- 901 21. Götze, M., Dufourt, J., Ihling, C., Rammelt, C., Pierson, S., Sambrani, N., Temme,  
902 C., Sinz, A., Simonelig, M., and Wahle, E. (2017). Translational repression of the  
903 *Drosophila nanos* mRNA involves the RNA helicase Belle and RNA coating by  
904 Me31B and Trailer hitch. 1552–1568.
- 905 22. Hara, M., Lourido, S., Petrova, B., Lou, H.J., Von Stetina, J.R., Kashevsky, H.,  
906 Turk, B.E., and Orr-Weaver, T.L. (2018). Identification of PNG kinase substrates  
907 uncovers interactions with the translational repressor TRAL in the oocyte-to-  
908 embryo transition. *Elife* 7, 1–19.
- 909 23. Holehouse, A.S., Garai, K., Lyle, N., Vitalis, A., and Pappu, R. V (2015).  
910 Quantitative assessments of the distinct contributions of polypeptide backbone  
911 amides versus side chain groups to chain expansion via chemical denaturation. *J.*  
912 *Am. Chem. Soc.* 137, 2984–2995.
- 913 24. Hondele, M., Sachdev, R., Heinrich, S., Wang, J., Vallotton, P., Fontoura, B.M.A.,  
914 and Weis, K. (2019). DEAD-box ATPases are global regulators of phase-separated  
915 organelles. *Nature* 573, 144–148.
- 916 25. Hubstenberger, A., Noble, S.L., Cameron, C., and Evans, T.C. (2013). Translation  
917 repressors, an RNA helicase, and developmental cues control RNP phase  
918 transitions during early development. *Dev. Cell* 27, 161–173.
- 919 26. Hubstenberger, A., Courel, M., Bénard, M., Souquere, S., Ernoult-Lange, M.,  
920 Chouaib, R., Yi, Z., Morlot, J.B., Munier, A., Fradet, M., et al. (2017). P-Body  
921 Purification Reveals the Condensation of Repressed mRNA Regulons. *Mol. Cell*  
922 68, 144-157.e5.
- 923 27. Hyman, A.A., Weber, C.A., and Jülicher, F. (2014). Liquid-Liquid Phase Separation  
924 in Biology. *Annu. Rev. Cell Dev. Biol.* 30, 39–58.
- 925 28. Jahnel, M., Behrndt, M., Jannasch, A., Schäffer, E., and Grill, S.W. (2011).  
926 Measuring the complete force field of an optical trap. *Opt. Lett.* 36, 1260–1262.

- 927 29. Jung, H., Gkogkas, C.G., Sonenberg, N., and Holt, C.E. (2014). Review Remote  
928 Control of Gene Function by Local Translation. *Cell* 157, 26–40.
- 929 30. Kabsch, W., and Sander, C. (1983). Dictionary of protein secondary structure:  
930 pattern recognition of hydrogen-bonded and geometrical features. *Biopolymers* 22,  
931 2577–2637.
- 932 31. Kaneuchi, T., Sartain, C. V, Takeo, S., Horner, V.L., Buehner, N.A., and Aigaki, T.  
933 (2015). Calcium waves occur as *Drosophila* oocytes activate. *112*, 791–796.
- 934 32. Kato, M., Han, T.W., Xie, S., Shi, K., Du, X., Wu, L.C., Mirzaei, H., Goldsmith, E.J.,  
935 Longgood, J., Pei, J., et al. (2012). Cell-free formation of RNA granules: Low  
936 complexity sequence domains form dynamic fibers within hydrogels. *Cell* 149,  
937 753–767.
- 938 33. Kedersha, N., Stoecklin, G., Ayodele, M., Yacono, P., Lykke-andersen, J., Marvin,  
939 J.F., Scheuner, D., Kaufman, R.J., Golan, D.E., and Anderson, P. (2005). Stress  
940 granules and processing bodies are dynamically linked sites of mRNP remodeling  
941 4. *169*, 871–884.
- 942 34. Kloc, M., and Etkin, L.D. (2005). RNA localization mechanisms in oocytes. *J. Cell*  
943 *Sci.* 118, 269–282.
- 944 35. Krauchunas, A.R., and Wolfner, M.F. (2013). Molecular Changes During Egg  
945 Activation. *Curr. Top. Dev. Biol.* 102, 267–292.
- 946 36. Kroschwald, S., Maharana, S., Mateju, D., Malinowska, L., Nüske, E., Poser, I.,  
947 Richter, D., and Alberti, S. (2015). Promiscuous interactions and protein  
948 disaggregases determine the material state of stress-inducible RNP granules. *Elife*  
949 4, 1–32.
- 950 37. Kroschwald, S., Munder, M.C., Maharana, S., Ruer, M., Hyman, A.A., Alberti, S.,  
951 Kroschwald, S., Munder, M.C., Maharana, S., Franzmann, T.M., et al. (2018).  
952 Different Material States of Pub1 Condensates Define Distinct Modes of Stress  
953 Adaptation and Article Different Material States of Pub1 Condensates Define  
954 Distinct Modes of Stress Adaptation and Recovery. *CellReports* 23, 3327–3339.
- 955 38. Lasko, P. (2012). mRNA localization and translational control in *Drosophila*  
956 oogenesis. *Cold Spring Harb. Perspect. Biol.* 4, 1–15.

- 957 39. Li, P., Banjade, S., Cheng, H.C., Kim, S., Chen, B., Guo, L., Llaguno, M.,  
958 Hollingsworth, J. V., King, D.S., Banani, S.F., et al. (2012). Phase transitions in the  
959 assembly of multivalent signalling proteins. *Nature* 483, 336–340.
- 960 40. Lin, M. Der, Jiao, X., Grima, D., Newbury, S.F., Kiledjian, M., and Chou, T. Bin  
961 (2008). *Drosophila* processing bodies in oogenesis. *Dev. Biol.* 322, 276–288.
- 962 41. Lin, Y., Protter, D.S.W., Rosen, M.K., and Parker, R. (2015a). Formation and  
963 Maturation of Phase-Separated Liquid Droplets by RNA-Binding Proteins. *Mol. Cell*  
964 60, 208–219.
- 965 42. Lin, Y., Protter, D.S.W., Rosen, M.K., and Parker, R. (2015b). Formation and  
966 Maturation of Phase-Separated Liquid Droplets by RNA-Binding Proteins. *Mol. Cell*  
967 60, 208–219.
- 968 43. Luo, Y., Na, Z., and Slavoff, S.A. (2018). P-Bodies: Composition, Properties, and  
969 Functions. *Biochemistry* 57, 2424–2431.
- 970 44. Lyon, A.S., Peeples, W.B., and Rosen, M.K. (2021). P H A S E S E P A R A T I O N  
971 I N B I O L O G Y. *Nat. Rev. Mol. Cell Biol.* 22.
- 972 45. Majumdar, A., Cesario, W.C., White-Grindley, E., Jiang, H., Ren, F., Khan, M.  
973 “Repon,” Li, L., Choi, E.M.-L., Kannan, K., Guo, F., et al. (2012). Critical Role of  
974 Amyloid-like Oligomers of *Drosophila* Orb2 in the Persistence of Memory. *Cell* 148,  
975 515–529.
- 976 46. Mao, A.H., and Pappu, R. V (2012). Crystal lattice properties fully determine short-  
977 range interaction parameters for alkali and halide ions. *J. Chem. Phys.* 137, 64104.
- 978 47. Martin, E.W., and Mittag, T. (2018). Relationship of Sequence and Phase  
979 Separation in Protein Low-Complexity Regions. *Biochemistry* 57, 2478–2487.
- 980 48. Martin, E.W., Holehouse, A.S., Peran, I., Farag, M., Incicco, J.J., Bremer, A.,  
981 Grace, C.R., Soranno, A., Pappu, R. V., and Mittag, T. (2020). Valence and  
982 patterning of aromatic residues determine the phase behavior of prion-like  
983 domains. *Science* (80-. ). 367, 694–699.
- 984 49. McCambridge, A., Solanki, D., Olchawa, N., Govani, N., Trinidad, J.C., and Gao,  
985 M. (2020). Comparative Proteomics Reveal Me31B’s Interactome Dynamics,  
986 Expression Regulation, and Assembly Mechanism into Germ Granules during

- 987 *Drosophila* Germline Development. *Sci. Rep.* *10*, 1–13.
- 988 50. McGibbon, R.T., Beauchamp, K.A., Harrigan, M.P., Klein, C., Swails, J.M.,  
989 Hernández, C.X., Schwantes, C.R., Wang, L.-P., Lane, T.J., and Pande, V.S.  
990 (2015). MDTraj: A Modern Open Library for the Analysis of Molecular Dynamics  
991 Trajectories. *Biophys. J.* *109*, 1528–1532.
- 992 51. Medioni, C., Mowry, K., and Besse, F. (2012). Principles and roles of mRNA  
993 localization in animal development. *Dev.* *139*, 3263–3276.
- 994 52. Mitrea, D.M., Cika, J.A., Guy, C.S., Ban, D., Banerjee, P.R., Stanley, C.B., Nourse,  
995 A., Deniz, A.A., and Kriwacki, R.W. (2016). Nucleophosmin integrates within the  
996 nucleolus via multi-modal interactions with proteins displaying R-rich linear motifs  
997 and rRNA. 1–33.
- 998 53. Monzo, K., Papoulas, O., Cantin, G.T., Wang, Y., Yates, J.R., and Sisson, J.C.  
999 (2006). Fragile X mental retardation protein controls trailer hitch expression and  
1000 cleavage furrow formation in *Drosophila* embryos. *Proc. Natl. Acad. Sci. U. S. A.*  
1001 *103*, 18160–18165.
- 1002 54. Morin, X., Daneman, R., Zavortink, M., and Chia, W. (2001). A protein trap strategy  
1003 to detect GFP-tagged proteins expressed from their endogenous loci in *Drosophila*.  
1004 *Proc. Natl. Acad. Sci. U. S. A.* *98*, 15050–15055.
- 1005 55. Murthy, A.C., Dignon, G.L., Kan, Y., Zerze, G.H., Parekh, S.H., Mittal, J., and  
1006 Fawzi, N.L. (2019). Molecular interactions underlying liquid – liquid phase  
1007 separation of the FUS low-complexity domain. *Nat. Struct. Mol. Biol.* *26*.
- 1008 56. Nakamura, A., Amikura, R., Hanyu, K., and Kobayashi, S. (2001). Me31B silences  
1009 translation of oocyte-localizing RNAs through the formation of cytoplasmic RNP  
1010 complex during *Drosophila* oogenesis. *Development* *128*, 3233–3242.
- 1011 57. Newcombe, E.A., Ruff, K.M., Sethi, A., Ormsby, A.R., Ramdhan, Y.M., Fox, A.,  
1012 Purcell, A.W., Gooley, P.R., Pappu, R. V, and Hatters, D.M. (2018). Tadpole-like  
1013 Conformations of Huntingtin Exon 1 Are Characterized by Conformational  
1014 Heterogeneity that Persists regardless of Polyglutamine Length. *J. Mol. Biol.* *430*,  
1015 1442–1458.
- 1016 58. Nott, T.J., Petsalaki, E., Farber, P., Jervis, D., Fussner, E., Plochowietz, A.,

- 1017 Craggs, T.D., Bazett-Jones, D.P., Pawson, T., Forman-Kay, J.D., et al. (2015).  
1018 Phase Transition of a Disordered Nuage Protein Generates Environmentally  
1019 Responsive Membraneless Organelles. *Mol. Cell* 57, 936–947.
- 1020 59. Pak, C.W., Kosno, M., Holehouse, A.S., Padrick, S.B., Mittal, A., Ali, R., Yunus,  
1021 A.A., Liu, D.R., Pappu, R. V, and Rosen, M.K. (2016). Sequence Determinants of  
1022 Intracellular Phase Separation by Complex Coacervation of a Disordered Protein.  
1023 *Mol. Cell* 63, 72–85.
- 1024 60. Parker, R., and Sheth, U. (2007). P Bodies and the Control of mRNA Translation  
1025 and Degradation. *Mol. Cell* 25, 635–646.
- 1026 61. Patel, A., Lee, H.O., Jawerth, L., Maharana, S., Jahnel, M., Hein, M.Y., Stoykov,  
1027 S., Mahamid, J., Saha, S., Franzmann, T.M., et al. (2015). A Liquid-to-Solid Phase  
1028 Transition of the ALS Protein FUS Accelerated by Disease Mutation. *Cell* 162,  
1029 1066–1077.
- 1030 62. Patel, S.S., Belmont, B.J., Sante, J.M., and Rexach, M.F. (2007). Natively Unfolded  
1031 Nucleoporins Gate Protein Diffusion across the Nuclear Pore Complex. 83–96.
- 1032 63. Powers, S.K., Holehouse, A.S., Korasick, D.A., Schreiber, K.H., Clark, N.M., Jing,  
1033 H., Emenecker, R., Han, S., Tycksen, E., Hwang, I., et al. (2019). Nucleo-  
1034 cytoplasmic Partitioning of ARF Proteins Controls Auxin Responses in *Arabidopsis*  
1035 *thaliana*. *Mol. Cell* 76, 177-190.e5.
- 1036 64. Protter, D.S.W., Rao, B.S., Treeck], B. [Van, Lin, Y., Mizoue, L., Rosen, M.K., and  
1037 Parker, R. (2018). Intrinsically Disordered Regions Can Contribute Promiscuous  
1038 Interactions to RNP Granule Assembly. *Cell Rep.* 22, 1401–1412.
- 1039 65. Puthanveetil, S. V (2013). RNA transport and long-term memory storage. 6286.
- 1040 66. Rajasethupathy, P., Fiumara, F., Sheridan, R., Betel, D., Puthanveetil, S. V,  
1041 Russo, J.J., Sander, C., Tuschl, T., and Kandel, E. (2009). Article Characterization  
1042 of Small RNAs in *Aplysia* Reveals a Role for miR-124 in Constraining Synaptic  
1043 Plasticity through CREB. *Neuron* 63, 803–817.
- 1044 67. Riback, J.A., Katanski, C.D., Kear-Scott, J.L., Pilipenko, E. V, Rojek, A.E., Sosnick,  
1045 T.R., and Drummond, D.A. (2017). Stress-Triggered Phase Separation Is an  
1046 Adaptive, Evolutionarily Tuned Response. *Cell* 168, 1028-1040.e19.

- 1047 68. Ribbeck, K., and Go, D. (2002). The permeability barrier of nuclear pore complexes  
1048 appears to operate via hydrophobic exclusion. *21*.
- 1049 69. Rog, O., Köhler, S., and Dernburg, A.F. (2017). The synaptonemal complex has  
1050 liquid crystalline properties and spatially regulates meiotic recombination factors.  
1051 *Elife* 6.
- 1052 70. Shin, Y., and Brangwynne, C.P. (2017). Liquid phase condensation in cell  
1053 physiology and disease. *Science* (80-. ). 357.
- 1054 71. Sudhakaran, I.P., and Ramaswami, M. (2017). Long-term memory consolidation:  
1055 The role of RNA- binding proteins with prion-like domains. *RNA Biol.* 14, 568–586.
- 1056 72. Tadros, W., and Lipshitz, H.D. (2009). The maternal-to-zygotic transition: a play in  
1057 two acts. *3042*, 3033–3042.
- 1058 73. Tritschler, F., Eulalio, A., Truffault, V., Hartmann, M.D., Helms, S., Schmidt, S.,  
1059 Coles, M., Izaurralde, E., and Weichenrieder, O. (2007). A Divergent Sm Fold in  
1060 EDC3 Proteins Mediates DCP1 Binding and P-Body Targeting. *Mol. Cell. Biol.* 27,  
1061 8600–8611.
- 1062 74. Tritschler, F., Eulalio, A., Helms, S., Schmidt, S., Coles, M., Weichenrieder, O.,  
1063 Izaurralde, E., and Truffault, V. (2008). Similar Modes of Interaction Enable Trailer  
1064 Hitch and EDC3 To Associate with DCP1 and Me31B in Distinct Protein  
1065 Complexes. *Mol. Cell. Biol.* 28, 6695–6708.
- 1066 75. Tritschler, F., Braun, J.E., Eulalio, A., Truffault, V., Izaurralde, E., and  
1067 Weichenrieder, O. (2009). Structural Basis for the Mutually Exclusive Anchoring of  
1068 P Body Components EDC3 and Tral to the DEAD Box Protein DDX6/Me31B. *Mol.*  
1069 *Cell* 33, 661–668.
- 1070 76. Vitalis, A., and Pappu, R. V (2009). ABSINTH: a new continuum solvation model  
1071 for simulations of polypeptides in aqueous solutions. *J. Comput. Chem.* 30, 673–  
1072 699.
- 1073 77. Wang, J.T., Smith, J., Chen, B., Schmidt, H., Rasoloson, D., Paix, A., Lambrus,  
1074 B.G., Calidas, D., Betzig, E., and Seydoux, G. (2014). Regulation of RNA granule  
1075 dynamics by phosphorylation of serine-rich, intrinsically disordered proteins in *C .*  
1076 *elegans*. 1–23.

- 1077 78. Wang, M., Ly, M., Lugowski, A., Laver, J.D., Lipshitz, H.D., Smibert, C.A., and  
1078 Rissland, O.S. (2017). ME31B globally represses maternal mRNAs by two distinct  
1079 mechanisms during the *Drosophila* maternal-to-zygotic transition. *Elife* 6, 1–22.
- 1080 79. Waterhouse, A., Bertoni, M., Bienert, S., Studer, G., Tauriello, G., Gumienny, R.,  
1081 Heer, F.T., de Beer, T.A.P., Rempfer, C., Bordoli, L., et al. (2018). SWISS-MODEL:  
1082 homology modelling of protein structures and complexes. *Nucleic Acids Res.* 46,  
1083 W296–W303.
- 1084 80. Weber, S.C. (2017). ScienceDirect Sequence-encoded material properties dictate  
1085 the structure and function of nuclear bodies. *Curr. Opin. Cell Biol.* 46, 62–71.
- 1086 81. Weber, S.C., and Brangwynne, C.P. (2012). Minireview Getting RNA and Protein  
1087 in Phase. *Cell* 149, 1188–1191.
- 1088 82. Weil, T.T., Forrest, K.M., and Gavis, E.R. (2006). Localization of bicoid mRNA in  
1089 late oocytes is maintained by continual active transport. *Dev. Cell* 11, 251–262.
- 1090 83. Weil, T.T., Parton, R.M., Herpers, B., Soetaert, J., Veenendaal, T., Xanthakis, D.,  
1091 Dobbie, I.M., Halstead, J.M., Hayashi, R., Rabouille, C., et al. (2012). *Drosophila*  
1092 patterning is established by differential association of mRNAs with P bodies. *Nat.*  
1093 *Cell Biol.* 14, 1305–1313.
- 1094 84. Wilhelm, J.E., Buszczak, M., and Sayles, S. (2005). Efficient protein trafficking  
1095 requires trailer hitch, a component of a ribonucleoprotein complex localized to the  
1096 ER in *Drosophila*. *Dev. Cell* 9, 675–685.
- 1097 85. Woodruff, J.B., Ferreira Gomes, B., Widlund, P.O., Mahamid, J., Honigmann, A.,  
1098 and Hyman, A.A. (2017). The Centrosome Is a Selective Condensate that  
1099 Nucleates Microtubules by Concentrating Tubulin. *Cell* 169, 1066-1077.e10.
- 1100 86. York-andersen, A.H., Parton, R.M., Bi, C.J., Bromley, C.L., Davis, I., and Weil, T.T.  
1101 (2015). RESEARCH ARTICLE A single and rapid calcium wave at egg activation  
1102 in *Drosophila*. 553–560.
- 1103 87. Zhang, H., Elbaum-Garfinkle, S., Langdon, E.M., Taylor, N., Occhipinti, P., Bridges,  
1104 A.A., Brangwynne, C.P., and Gladfelter, A.S. (2015). RNA Controls PolyQ Protein  
1105 Phase Transitions. *Mol. Cell* 60, 220–230.



1106 **MATERIALS AND METHODS REFERENCES**

- 1107 1. Buszczak, M., Paterno, S., Lighthouse, D., Bachman, J., Planck, J., Owen, S.,  
1108 Skora, A.D., Nystul, T.G., Ohlstein, B., Allen, A., et al. (2007). The carnegie protein  
1109 trap library: a versatile tool for *Drosophila* developmental studies. *Genetics* 175,  
1110 1505–1531.
- 1111 2. Cubuk, J., Alston, J.J., Incicco, J.J., Singh, S., Stuchell-Brereton, M.D., Ward,  
1112 M.D., Zimmerman, M.I., Vithani, N., Griffith, D., Wagoner, J.A., et al. (2020). The  
1113 SARS-CoV-2 nucleocapsid protein is dynamic, disordered, and phase separates  
1114 with RNA. *BioRxiv*.
- 1115 3. Holehouse, A.S., Garai, K., Lyle, N., Vitalis, A., and Pappu, R. V (2015).  
1116 Quantitative assessments of the distinct contributions of polypeptide backbone  
1117 amides versus side chain groups to chain expansion via chemical denaturation. *J.*  
1118 *Am. Chem. Soc.* 137, 2984–2995.
- 1119 4. Jahnel, M., Behrndt, M., Jannasch, A., Schäffer, E., and Grill, S.W. (2011).  
1120 Measuring the complete force field of an optical trap. *Opt. Lett.* 36, 1260–1262.
- 1121 5. Kabsch, W., and Sander, C. (1983). Dictionary of protein secondary structure:  
1122 pattern recognition of hydrogen-bonded and geometrical features. *Biopolymers* 22,  
1123 2577–2637.
- 1124 6. Mao, A.H., and Pappu, R. V (2012). Crystal lattice properties fully determine short-  
1125 range interaction parameters for alkali and halide ions. *J. Chem. Phys.* 137, 64104.
- 1126 7. Martin, E.W., and Mittag, T. (2018). Relationship of Sequence and Phase  
1127 Separation in Protein Low-Complexity Regions. *Biochemistry* 57, 2478–2487.
- 1128 8. Martin, E.W., Holehouse, A.S., Peran, I., Farag, M., Incicco, J.J., Bremer, A.,  
1129 Grace, C.R., Soranno, A., Pappu, R. V., and Mittag, T. (2020). Valence and  
1130 patterning of aromatic residues determine the phase behavior of prion-like  
1131 domains. *Science* (80). 367, 694–699.
- 1132 9. McGibbon, R.T., Beauchamp, K.A., Harrigan, M.P., Klein, C., Swails, J.M.,  
1133 Hernández, C.X., Schwantes, C.R., Wang, L.-P., Lane, T.J., and Pande, V.S.  
1134 (2015). MDTraj: A Modern Open Library for the Analysis of Molecular Dynamics  
1135 Trajectories. *Biophys. J.* 109, 1528–1532.
- 1136 10. Morin, X., Daneman, R., Zavortink, M., and Chia, W. (2001). A protein trap strategy  
1137 to detect GFP-tagged proteins expressed from their endogenous loci in *Drosophila*.  
1138 *Proc. Natl. Acad. Sci. U. S. A.* 98, 15050–15055.

- 1139 11. Newcombe, E.A., Ruff, K.M., Sethi, A., Ormsby, A.R., Ramdzan, Y.M., Fox, A.,  
1140 Purcell, A.W., Gooley, P.R., Pappu, R. V, and Hatters, D.M. (2018). Tadpole-like  
1141 Conformations of Huntingtin Exon 1 Are Characterized by Conformational  
1142 Heterogeneity that Persists regardless of Polyglutamine Length. *J. Mol. Biol.* *430*,  
1143 1442–1458.
- 1144 12. Vitalis, A., and Pappu, R. V (2009). ABSINTH: a new continuum solvation model  
1145 for simulations of polypeptides in aqueous solutions. *J. Comput. Chem.* *30*, 673–  
1146 699.
- 1147 13. Waterhouse, A., Bertoni, M., Bienert, S., Studer, G., Tauriello, G., Gumienny, R.,  
1148 Heer, F.T., de Beer, T.A.P., Rempfer, C., Bordoli, L., et al. (2018). SWISS-MODEL:  
1149 homology modelling of protein structures and complexes. *Nucleic Acids Res.* *46*,  
1150 W296–W303.
- 1151 14. Weil, T.T., Forrest, K.M., and Gavis, E.R. (2006). Localization of bicoid mRNA in  
1152 late oocytes is maintained by continual active transport. *Dev. Cell* *11*, 251–262.
- 1153 15. Wilhelm, J.E., Buszczak, M., and Sayles, S. (2005). Efficient protein trafficking  
1154 requires trailer hitch, a component of a ribonucleoprotein complex localized to the  
1155 ER in *Drosophila*. *Dev. Cell* *9*, 675–685.
- 1156 16. York-andersen, A.H., Parton, R.M., Bi, C.J., Bromley, C.L., Davis, I., and Weil, T.T.  
1157 (2015). A single and rapid calcium wave at egg activation in *Drosophila*. *Biology*  
1158 *Open* 553–560.
